# Supplementary material for: A multicomponent, facile and catalyst-free microwave-assisted protocol for the synthesis of pyrazolo-[3,4-b]-quinolines under green conditions
Source: Royal Society of Chemistry journal article supplement (doi:10.1039/c9ra04604f), 2019-01-01
Supplement: c9ra04604f1.pdf [file c9ra04604f1.pdf]

## **A multicomponent, facile and catalyst-free microwave-assisted protocol for the synthesis of pyrazolo[3,4-*b*]-quinolines under green conditions**

Mandlenkosi Khumalo, Surya Narayana Maddila, Suresh Maddila and Sreekantha B Jonnalagadda\*

\*School of Chemistry & Physics, University of KwaZulu-Natal, Westville Campus, Chiltern Hills, Durban-4000, South Africa.

**\*Corresponding Author:** Prof. Sreekantha B. Jonnalagadda

School of Chemistry & Physics,  
University of KwaZulu-Natal,  
Durban 4000, South Africa.

Tel.: +27 31 2607325,

Fax: +27 31 2603091

E-mail: [jonnalagaddas@ukzn.ac.za](mailto:jonnalagaddas@ukzn.ac.za)

| <b>Contents</b>                                                   | <b>Pages</b> |
|-------------------------------------------------------------------|--------------|
| <b>All the Instruments details– S1</b>                            | <b>2</b>     |
| <b>Products characterization data-S2</b>                          | <b>3-8</b>   |
| <b>All spectral information of the synthesized compounds – S2</b> | <b>9-45</b>  |

## **Materials and instruments**

All reagents and chemicals were of analytical grade, purchased from Sigma-Aldrich and used without further purification. MW-assisted reaction was carried out in a CEM-908010, 300-W bench mate model laboratory MW reactor at room temperature. The MW power was set to 100 W for the reaction at 80 °C with high stirring. Progress of the reaction was monitored by thin layer chromatography (TLC) coated with silica gel 60 F254. High-resolution mass data were obtained using a Bruker micro TOF-Q II ESI instrument operating at ambient temperature. A Bruker AMX 400 MHz NMR spectrometer was used to record the  $^1\text{H}$ -NMR,  $^{15}\text{N}$ -NMR,  $^{13}\text{C}$ -NMR spectral values of the products in  $\text{DMSO-d}_6$ . TMS served as internal standard for reporting the chemical shifts in  $\delta$  (ppm).

**Products characterization data:**

**4-(2,3-Dihydroxyphenyl)-3,7,7-trimethyl-1-phenyl-6,7,8,9-tetrahydro-1H-pyrazolo[3,4-b]quinolin-5(4H)-one (4a):** 94% Yield, White solid (282.56 mg); m.p. 119–121 °C; <sup>1</sup>H NMR (400 MHz, DMSO-d<sub>6</sub>) δ = 0.89 (s, 3H, CH<sub>3</sub>), 0.99 (s, 3H, CH<sub>3</sub>), 1.83 (s, 3H, CH<sub>3</sub>), 1.89 (d, *J* = 5.12 Hz, 1H, CH), 2.05 (d, *J* = 16.36 Hz, 1H, CH), 2.22 (d, *J* = 16.24 Hz, 1H, CH), 2.63 (d, *J* = 5.28 Hz, 1H, CH), 5.25 (s, 1H, CH), 6.27 – 6.29 (m, 1H, CH), 6.50 (t, *J* = 3.28 Hz, 2H, ArH), 7.37 – 7.39 (m, 1H, ArH), 7.52 (t, *J* = 1.72 Hz, 4H, ArH), 8.94 (s, 2H, OH), 9.59 (s, 1H, NH); <sup>13</sup>C NMR (100 MHz, DMSO-d<sub>6</sub>): 11.69, 26.60, 28.19, 28.64, 31.91, 40.74, 50.09, 104.43, 109.53, 112.66, 119.27, 119.33, 123.12, 126.77, 129.31, 134.78, 136.44, 138.13, 141.28, 145.48, 145.98, 153.13, 195.65; <sup>15</sup>N NMR (40.55 MHz, DMSO-d<sub>6</sub>) δ = 9.59 (s, 1H, NH); HRMS of [C<sub>25</sub>H<sub>25</sub>N<sub>3</sub>O<sub>3</sub>+Na]<sup>+</sup> (m/z): 438.1734; Calcd.: 438.1794.

**4-(2-(Trifluoromethyl)phenyl)-3,7,7-trimethyl-1-phenyl-6,7,8,9-tetrahydro-1H-pyrazolo[3,4-b]quinolin-5(4H)-one (4b):** 93% Yield, Light yellow solid (240.98 mg); m.p. 136–137 °C; <sup>1</sup>H NMR (400 MHz, DMSO-d<sub>6</sub>) δ = 0.91 (s, 3H, CH<sub>3</sub>), 0.99 (s, 3H, CH<sub>3</sub>), 1.75 (s, 3H, CH<sub>3</sub>), 1.93 (d, *J* = 16.04 Hz, 1H, CH), 2.14 (d, *J* = 16.04 Hz, 1H, CH), 2.51 (d, *J* = 8.24 Hz, 2H, CH<sub>2</sub>), 5.44 (s, 1H, CH), 7.27 – 7.39 (m, 4H, ArH), 7.40 – 7.53 (m, 5H, ArH), 9.44 (s, 1H, NH); <sup>13</sup>C NMR (100 MHz, DMSO-d<sub>6</sub>): 12.24, 26.69, 28.66, 31.86, 32.08, 40.67, 50.38, 103.25, 109.67, 120.56, 123.38, 123.80, 126.05, 126.69, 127.00, 128.73, 129.32, 132.00, 132.23, 136.44, 137.92, 145.79, 151.55, 193.59; <sup>15</sup>N NMR (40.55 MHz, DMSO-d<sub>6</sub>) δ = 9.44 (s, 1H, NH); HRMS of [C<sub>26</sub>H<sub>24</sub>F<sub>3</sub>N<sub>3</sub>O+Na]<sup>+</sup> (m/z): 474.1776; Calcd.: 474.1769.

**4-(2-Fluorophenyl)-3,7,7-trimethyl-1-phenyl-6,7,8,9-tetrahydro-1H-pyrazolo[3,4-b]quinolin-5(4H)-one (4c):** 94% Yield, Creamy solid (303.85 mg); m.p. 183–184 °C; <sup>1</sup>H NMR (400 MHz, DMSO-d<sub>6</sub>) δ = 1.00 (s, 3H, CH<sub>3</sub>), 1.07 (s, 3H, CH<sub>3</sub>), 1.93 (s, 3H, CH<sub>3</sub>), 2.04 (d, *J* = 16.08 Hz, 1H, CH), 2.22 (d, *J* = 16.08 Hz, 1H, CH), 2.57 (d, *J* = 7.8 Hz, 2H, CH<sub>2</sub>), 5.31 (s, 1H, CH), 7.10 – 7.13 (m, 2H, ArH), 7.19 – 7.27 (m, 2H, ArH), 7.42 – 7.46 (m, 1H, ArH), 7.54 – 7.60 (m, 4H, ArH), 9.52 (s, 1H, NH); <sup>13</sup>C NMR (100 MHz, DMSO-d<sub>6</sub>): 11.58, 26.58, 28.87, 31.92, 38.84, 40.09, 50.29, 102.97, 108.14, 123.12, 124.15, 126.85, 129.35, 130.10, 136.35, 138.03, 145.80, 152.12, 193.82; <sup>15</sup>N NMR (40.55 MHz, DMSO-d<sub>6</sub>) δ = 9.52 (s, 1H, NH); HRMS of [C<sub>25</sub>H<sub>24</sub>FN<sub>3</sub>O+Na]<sup>+</sup> (m/z): 424.1807; Calcd.: 424.1801.

**4-o-Tolyl-3,7,7-trimethyl-1-phenyl-6,7,8,9-tetrahydro-1H-pyrazolo[3,4-b]quinolin-5(4H)-one (4d):** 98% Yield, Creamy solid (323.98 mg); m.p. 200–201 °C; <sup>1</sup>H NMR (400 MHz, DMSO-d<sub>6</sub>) δ = 0.90 (s, 3H, CH<sub>3</sub>), 0.99 (s, 3H, CH<sub>3</sub>), 1.70 (s, 1H, CH), 1.79 (s, 3H, CH<sub>3</sub>), 1.93 (t, *J* = 16.24 Hz, 2H, CH<sub>2</sub>), 2.14 (d, *J* = 16.12 Hz, 1H, CH), 2.59 (s, 3H, CH<sub>3</sub>), 5.12 (s, 1H, CH), 6.94 – 6.97 (m, 1H, ArH), 7.02 (s, 3H, ArH), 7.36 – 7.40 (m, 1H, ArH), 7.51 (t, *J* = 2.44 Hz, 4H, ArH), 9.36 (s, 1H, NH); <sup>13</sup>C NMR (100 MHz, DMSO-d<sub>6</sub>): 11.96, 19.35, 26.61, 28.81, 31.93, 40.64, 50.39, 104.64, 110.46, 120.48, 123.02, 125.21, 125.91, 126.73, 128.93, 129.16, 129.32, 134.02, 136.30, 138.14, 145.87, 151.20, 194.15; <sup>15</sup>N NMR (40.55 MHz, DMSO-d<sub>6</sub>) δ = 9.36 (s, 1H, NH); HRMS of [C<sub>26</sub>H<sub>27</sub>N<sub>3</sub>O + Na]<sup>+</sup> (m/z): 420.2061; Calcd.: 420.2052.

**4-(3,4,5-Trimethoxyphenyl)-3,7,7-trimethyl-1-phenyl-6,7,8,9-tetrahydro-1H-pyrazolo[3,4-b]quinolin-5(4H)-one (4e):** 94% Yield, White solid (226.72 mg); m.p. 197–198 °C; <sup>1</sup>H NMR (400 MHz, DMSO-d<sub>6</sub>) δ = 1.01 (s, 3H, CH<sub>3</sub>), 1.02 (s, 3H, CH<sub>3</sub>), 1.91 (s, 3H, CH<sub>3</sub>), 2.03 (d, *J* = 15.04 Hz, 1H, CH), 2.20 (d, *J* = 16.12 Hz, 1H, CH), 2.52 (d, *J* = 7.08 Hz, 2H, CH<sub>2</sub>), 3.59 (s, 3H, OCH<sub>3</sub>), 3.70 (s, 3H, OCH<sub>3</sub>), 3.73 (s, 3H, OCH<sub>3</sub>), 4.95 (s, 1H, CH), 6.49 (s, 2H, ArH), 7.33 – 7.39 (m, 2H, ArH), 7.50 (t, *J* = 3.64 Hz, 3H, ArH), 9.39 (s, 1H, NH); <sup>13</sup>C NMR (100 MHz, DMSO-d<sub>6</sub>): 12.22, 13.84, 26.37, 27.68, 29.18, 31.86, 35.82, 40.64, 50.34, 55.64, 59.85, 104.16, 104.49, 105.29, 109.15, 120.64, 123.07, 126.01, 129.31, 135.40, 135.94, 138.09, 143.61, 145.91, 151.74, 152.43, 152.46, 163.54, 194.13; <sup>15</sup>N NMR (40.55 MHz, DMSO-d<sub>6</sub>) δ = 9.39 (s, 1H, NH); HRMS of [C<sub>28</sub>H<sub>31</sub>N<sub>3</sub>O<sub>4</sub> + Na]<sup>+</sup> (m/z): 496.2218; Calcd.: 496.2212.

**4-(3-Hydroxy-4-methoxyphenyl)-3,7,7-trimethyl-1-phenyl-6,7,8,9-tetrahydro-1H-pyrazolo[3,4-b]quinolin-5(4H)-one (4f):** 92% Yield, White solid (259.52 mg); m.p. 239–241 °C; <sup>1</sup>H NMR (400 MHz, DMSO-d<sub>6</sub>) δ = 0.93 (s, 3H, CH<sub>3</sub>), 0.99 (s, 3H, CH<sub>3</sub>), 1.90 (s, 3H, CH<sub>3</sub>), 2.00 (d, *J* = 16.12 Hz, 2H, CH<sub>2</sub>), 2.14 (d, *J* = 16.08 Hz, 2H, CH<sub>2</sub>), 3.68 (s, 3H, OCH<sub>3</sub>), 4.84 (s, 1H, CH), 6.57 – 6.61 (m, 2H, ArH), 6.73 (d, *J* = 8.12 Hz, 1H, ArH), 7.35 – 7.39 (m, 1H, ArH), 7.48 – 7.51 (m, 4H, ArH), 8.70 (s, 1H, OH), 9.34 (s, 1H, NH); <sup>13</sup>C NMR (100 MHz, DMSO-d<sub>6</sub>): 11.96, 26.77, 28.85, 31.88, 34.81, 40.64, 50.47, 55.55, 104.43, 109.77, 111.62, 115.12, 118.08, 120.53, 122.96, 126.68, 129.31, 136.09, 138.18, 140.55, 145.50, 145.86, 150.87, 193.99; <sup>15</sup>N NMR (40.55 MHz, DMSO-d<sub>6</sub>) δ = 9.34 (s, 1H, NH); HRMS of [C<sub>26</sub>H<sub>27</sub>N<sub>3</sub>O<sub>3</sub> + Na]<sup>+</sup> (m/z): 452.1961; Calcd.: 452.1950.

**4-(3-Methoxyphenyl)-3,7,7-trimethyl-1-phenyl-6,7,8,9-tetrahydro-1H-pyrazolo[3,4-b]quinolin-5(4H)-one (4g):** 96% Yield, White solid (291.35 mg); m.p. 176–178 °C; <sup>1</sup>H NMR (400 MHz, DMSO-d<sub>6</sub>) δ = 0.94 (s, 3H, CH<sub>3</sub>), 1.00 (s, 3H, CH<sub>3</sub>), 1.91 (s, 3H, CH<sub>3</sub>), 2.00 (d, *J* = 16.12 Hz, 1H, CH), 2.16 (d, *J* = 16.12 Hz, 1H, CH), 2.51 (d, *J* = 4.96 Hz, 2H, CH<sub>2</sub>), 3.68 (s, 3H, OCH<sub>3</sub>), 4.95 (s, 1H, CH), 6.65 – 6.67 (m, 1H, ArH), 6.74 – 6.79 (m, 2H, ArH), 7.13 (t, *J* = 7.84 Hz, 1H, ArH), 7.37 – 7.39 (m, 1H, ArH), 7.50 (t, *J* = 3.44 Hz, 4H, ArH), 9.38 (s, 1H, NH); <sup>13</sup>C NMR (100 MHz, DMSO-d<sub>6</sub>): 12.01, 26.62, 27.70, 28.90, 31.90, 35.64, 50.37, 54.75, 104.07, 109.33, 110.41, 113.62, 119.86, 120.62, 123.05, 129.32, 136.09, 138.09, 145.93, 149.23, 151.47, 158.67, 158.92, 194.03; <sup>15</sup>N NMR (40.55 MHz, DMSO-d<sub>6</sub>) δ = 9.38 (s, 1H, NH); HRMS of [C<sub>26</sub>H<sub>27</sub>N<sub>3</sub>O<sub>2</sub>+Na]<sup>+</sup> (m/z): 436.2008; Calcd.: 436.2001.

**4-(4-Ethylphenyl)-3,7,7-trimethyl-1-phenyl-6,7,8,9-tetrahydro-1H-pyrazolo[3,4-b]quinolin-5(4H)-one (4h):** 95% Yield, Light yellow solid (291.15 mg); m.p. 246–248 °C; <sup>1</sup>H NMR (400 MHz, DMSO-d<sub>6</sub>) δ = 0.93 (s, 3H, CH<sub>3</sub>), 0.99 (s, 3H, CH<sub>3</sub>), 1.12 (t, *J* = 7.56 Hz, 3H, CH<sub>3</sub>), 1.88 (s, 3H, CH<sub>3</sub>), 1.98 (d, *J* = 16.08 Hz, 1H, CH), 2.15 (d, *J* = 16.08 Hz, 2H, CH<sub>2</sub>), 2.50 – 2.54 (m, 2H, CH<sub>2</sub>), 4.94 (s, 1H, CH), 7.04 (d, *J* = 8.08, 2H, ArH), 7.10 (d, *J* = 8.08, 2H, ArH), 7.35 – 7.39 (m, 1H, ArH), 7.48 – 7.52 (m, 4H, ArH), 9.36 (s, 1H, NH); <sup>13</sup>C NMR (100 MHz, DMSO-d<sub>6</sub>): 11.96, 26.75, 27.66, 28.84, 31.92, 35.22, 40.63, 50.40, 104.35, 109.60, 120.57, 123.00, 126.72, 127.17, 127.36, 129.15, 136.06, 138.14, 140.69, 145.02, 145.88, 151.29, 193.99; <sup>15</sup>N NMR (40.55 MHz, DMSO-d<sub>6</sub>) δ = 9.36 (s, 1H, NH); HRMS of [C<sub>27</sub>H<sub>29</sub>N<sub>3</sub>O+Na]<sup>+</sup> (m/z): 434.2215; Calcd.: 434.2208.

**4-(4-Methoxyphenyl)-3,7,7-trimethyl-1-phenyl-6,7,8,9-tetrahydro-1H-pyrazolo[3,4-b]quinolin-5(4H)-one (4i):** 94% Yield, White solid (285.86 mg); m.p. 221–223 °C; <sup>1</sup>H NMR (400 MHz, DMSO-d<sub>6</sub>) δ = 0.92 (s, 3H, CH<sub>3</sub>), 0.99 (s, 3H, CH<sub>3</sub>), 1.85 (s, 1H, CH), 1.87 (s, 3H, CH<sub>3</sub>), 1.98 (d, *J* = 16.12 Hz, 1H, CH), 2.14 (d, *J* = 16.12 Hz, 1H, CH), 3.19 (s, 1H, CH), 3.68 (s, 3H, OCH<sub>3</sub>), 4.93 (s, 1H, CH), 6.77 (d, *J* = 8.64 Hz, 2H, ArH), 7.10 (d, *J* = 8.64, 2H, ArH), 7.35 – 7.39 (m, 1H, ArH), 7.51 (t, *J* = 2.44, 4H, ArH), 9.34 (s, 1H, NH); <sup>13</sup>C NMR (100 MHz, DMSO-d<sub>6</sub>): 11.91, 26.69, 27.67, 28.85, 31.89, 34.71, 47.73, 50.42, 54.85, 104.38, 109.77, 113.14, 120.56, 122.99, 126.69, 128.42, 128.88, 129.15, 129.30, 136.10, 138.16, 139.92, 145.91, 150.98, 157.08, 193.97; <sup>15</sup>N NMR (40.55 MHz, DMSO-d<sub>6</sub>) δ = 9.34 (s, 1H, NH).

**1,4-Diphenyl-3,7,7-trimethyl-6,7,8,9-tetrahydro-1H-pyrazolo[3,4-b]quinolin-5(4H)-one (4j):** Yield 91%. White solid (32.60 mg); m.p. 190–192 °C; <sup>1</sup>H NMR (400 MHz, DMSO-d<sub>6</sub>) δ = 1.00 (s, 3H, CH<sub>3</sub>), 1.05 (s, 3H, CH<sub>3</sub>), 2.02 (s, 3CH, CH<sub>3</sub>) 2.18 (d, *J* = 6.64 Hz, 2H, CH<sub>2</sub>), 2.36 (s, 2H, CH<sub>2</sub>), 5.13 (s, 1H, CH), 6.53 (s, 1H, NH), 7.09 – 7.14 (m, 1H, ArH), 7.23 (t, *J* = 7.36, 2H, ArH), 7.28 (d, *J* = 7 Hz, 2H, ArH), 7.47 (s, 5H, ArH), 9.36; <sup>13</sup>C NMR (100 MHz, DMSO-d<sub>6</sub>): 12.12, 27.40, 28.22, 29.02, 32.61, 36.12, 42.51, 48.58, 50.84, 104.83, 112.21, 121.17, 122.90, 126.01, 126.07, 127.13, 127.55, 127.71, 127.94, 127.96, 128.11, 129.05, 129.97, 135.70, 137.76, 146.33, 147.58, 148.72, 195.38; <sup>15</sup>N NMR (40.55 MHz, DMSO-d<sub>6</sub>) δ = 6.53 (s, 1H, NH); HRMS of [C<sub>25</sub>H<sub>25</sub>N<sub>3</sub>O + Na]<sup>+</sup> (m/z): 406.1901; Calcd.: 406.1895.

**4-(Pyridin-3-yl)-3,7,7-trimethyl-1-phenyl-6,7,8,9-tetrahydro-1H-pyrazolo[3,4-b]quinolin-5(4H)-one (4k):** Yield 94%. Brown solid (337.17 mg); m.p. 239–241 °C; <sup>1</sup>H NMR (400 MHz, DMSO-d<sub>6</sub>) δ = 0.91 (s, 3H, CH<sub>3</sub>), 1.00 (s, 3H, CH<sub>3</sub>), 1.87 (s, 3CH, CH<sub>3</sub>) 2.00 (d, *J* = 16.16 Hz, H, CH), 2.17 (d, *J* = 16.12 Hz, 1H, CH), 2.52 (d, *J* = 10.16 Hz, 2H, CH<sub>2</sub>), 5.04 (s, 1H, CH), 7.25 – 7.28 (m, 1H, ArH), 7.38 – 7.42 (m, 1H, ArH), 7.52 (d, *J* = 4.24 Hz, 4H, ArH), 7.56 – 7.58 (m, 1H, ArH), 8.31 (dd, *J* = 1.48, 3.2 Hz, 1H, ArH), 8.48 (d, *J* = 1.88 Hz, 1H, ArH), 9.52 (s, 1H, NH); <sup>13</sup>C NMR (100 MHz, DMSO-d<sub>6</sub>): 12.33, 27.20, 29.19, 32.45, 34.01, 41.07, 50.77, 103.64, 109.14, 121.09, 123.75, 123.79, 127.43, 129.70, 129.81, 135.46, 136.82, 138.53, 143.12, 146.38, 147.26, 149.39, 152.32, 194.48; <sup>15</sup>N NMR (40.55 MHz, DMSO-d<sub>6</sub>) δ = 9.52 (s, 1H, NH); HRMS of [C<sub>24</sub>H<sub>24</sub>N<sub>4</sub>O + Na]<sup>+</sup> (m/z): 407.1859; Calcd.: 407.1848.

**4-(3,4-Dihydroxyphenyl)-3,7,7-trimethyl-1-phenyl-6,7,8,9-tetrahydro-1H-pyrazolo[3,4-b]quinolin-5(4H)-one (4l):** 95% Yield, Pale red solid (285.57 mg); m.p. 216–217 °C; <sup>1</sup>H NMR (400 MHz, CDCl<sub>3</sub>) δ = 0.95 (s, 3H, CH<sub>3</sub>), 1.00 (s, 3H, CH<sub>3</sub>), 1.91 (s, 3H, CH<sub>3</sub>), 1.99 (d, *J* = 16.12 Hz, 1H, CH), 2.16 (d, *J* = 16.08 Hz, 1H, CH), 2.49 (d, *J* = 3.48 Hz, 2H, CH<sub>2</sub>), 4.81 (s, 1H, CH), 6.47 (d, *J* = 8.04 Hz, 1H, ArH), 6.57 (t, *J* = 6.52 Hz, 2H, ArH), 7.36 – 7.39 (m, 1H, ArH), 7.50 (t, *J* = 15.44, 4H, ArH), 8.53 (s, 1H, OH), 8.62 (s, 1H, OH), 9.30 (s, 1H, NH); <sup>13</sup>C NMR (100 MHz, CDCl<sub>3</sub>): 12.47, 19.01, 27.27, 29.38, 32.37, 35.23, 41.16, 51.02, 56.51, 105.16, 110.49, 115.32, 115.68, 118.79, 123.42, 127.47, 129.82, 136.59, 138.71, 139.48, 143.48, 145.02, 146.47, 151.23, 194.55; <sup>15</sup>N NMR (40.55 MHz, CDCl<sub>3</sub>) δ = 9.30 (s, 1H, NH); HRMS of [C<sub>25</sub>H<sub>25</sub>F<sub>3</sub>N<sub>3</sub>O<sub>3</sub> + H]<sup>+</sup> (m/z): 416.1319; Calcd.: 416.1331.

**4-(3-Fluorophenyl)-3,7,7-trimethyl-1-phenyl-6,7,8,9-tetrahydro-1H-pyrazolo[3,4-b]**

**quinolin-5(4H)-one (4m):** 93% Yield, White color solid (300.62 mg); m.p. 204–205 °C; <sup>1</sup>H NMR (400 MHz, CDCl<sub>3</sub>) δ = 0.91 (s, 3H, CH<sub>3</sub>), 0.96 (s, 3H, CH<sub>3</sub>), 1.98 (s, 3H, CH<sub>3</sub>), 2.10 (d, *J* = 8.92 Hz, 2H, CH<sub>2</sub>), 2.28 (s, 2H, CH<sub>2</sub>), 5.05 (s, 1H, CH), 6.72 – 6.76 (m, 1H, ArH), 6.85 (d, *J* = 10.08 Hz, 1H, ArH), 6.95 (s, 1H, NH), 7.02 (d, *J* = 7.56 Hz, 1H, ArH), 7.18 (s, 1H, ArH), 7.26 (d, *J* = 3.24 Hz, 1H, ArH), 7.32 (t, *J* = 2.44 Hz, 1H, ArH), 7.65 (d, *J* = 9.24 Hz, 1H, ArH), 7.77 (d, *J* = 7.68 Hz, 1H, ArH); <sup>13</sup>C NMR (100 MHz, CDCl<sub>3</sub>): 12.08, 27.31, 29.00, 32.53, 36.01, 42.27, 50.67, 104.24, 111.40, 123.14, 124.48, 125.73, 125.76, 127.65, 129.86, 135.72, 137.69, 147.53, 149.78, 161.30, 161.75, 163.75, 164.19, 195.71; <sup>15</sup>N NMR (40.55 MHz, CDCl<sub>3</sub>) δ = 6.95 (s, 1H, NH). HRMS of [C<sub>25</sub>H<sub>24</sub>FN<sub>3</sub>O +Na]<sup>+</sup> (m/z): 424.0843; Calcd.: 424.0836.

**4-(4-Fluorophenyl)-3,7,7-trimethyl-1-phenyl-6,7,8,9-tetrahydro-1H-pyrazolo[3,4-b]**

**quinolin-5(4H)-one (4n):** 94% Yield, Ash solid (303.85 mg); m.p. 221–223 °C; <sup>1</sup>H NMR (400 MHz, CDCl<sub>3</sub>) δ = 0.91 (s, 3H, CH<sub>3</sub>), 0.97 (s, 3H, CH<sub>3</sub>), 1.92 (s, 3H, CH<sub>3</sub>), 2.09 (d, *J* = 7.24 Hz, 2H, CH<sub>2</sub>), 2.28 (s, 2H, CH<sub>2</sub>), 5.04 (s, 1H, CH), 6.60 (s, 1H, NH), 6.84 (d, *J* = 8.6 Hz, 2H, ArH), 7.18 (d, *J* = 10.32 Hz, 2H, ArH), 7.39 (s, 5H, ArH); <sup>13</sup>C NMR (100 MHz, DMSO-d<sub>6</sub>): 12.14, 27.32, 28.99, 32.57, 35.48, 42.44, 50.82, 104.53, 111.98, 114.68, 114.89, 122.87, 124.44, 127.48, 129.36, 129.44, 129.93, 135.60, 137.95, 142.28, 142.31, 147.54, 148.82, 159.97, 162.39, 195.42; <sup>15</sup>N NMR (40.55 MHz, CDCl<sub>3</sub>) δ = 6.60 (s, 1H, NH); HRMS of [C<sub>25</sub>H<sub>24</sub>FN<sub>3</sub>O +Na]<sup>+</sup> (m/z): 424.1101; Calcd.: 424.1109.

**4-(4-Bromophenyl)-3,7,7-trimethyl-1-phenyl-6,7,8,9-tetrahydro-1H-pyrazolo[3,4-b]**

**quinolin-5(4H)-one (4o):** 92% Yield, White solid (229.28 mg); m.p. 190–192 °C; <sup>1</sup>H NMR (400 MHz, CDCl<sub>3</sub>) δ = 0.91 (s, 3H, CH<sub>3</sub>), 0.98 (s, 3H, CH<sub>3</sub>), 1.92 (s, 3H, CH<sub>3</sub>), 2.10 (d, *J* = 8.64 Hz, 2H, CH<sub>2</sub>), 2.28 (s, 2H, CH<sub>2</sub>), 5.04 (s, 1H, CH), 6.55 (s, 1H, NH), 7.14 (d, *J* = 3.92 Hz, 4H, ArH), 7.39 – 7.41 (m, 5H, ArH); <sup>13</sup>C NMR (100 MHz, CDCl<sub>3</sub>): 12.16, 27.34, 29.00, 32.59, 35.70, 42.47, 50.82, 104.26, 111.76, 122.87, 124.54, 127.52, 128.21, 129.39, 129.59, 129.95, 130.91, 131.62, 135.61, 137.90, 144.97, 147.51, 148.89, 195.34; <sup>15</sup>N NMR (40.55 MHz, CDCl<sub>3</sub>) δ = 6.55 (s, 1H, NH). HRMS of [C<sub>25</sub>H<sub>24</sub>BrN<sub>3</sub>O +Na]<sup>+</sup> (m/z): 484.2441; Calcd.: 484.2445.

**4-(4-Chlorophenyl)-3,7,7-trimethyl-1-phenyl-6,7,8,9-tetrahydro-1H-pyrazolo[3,4-b]**

**quinolin-5(4H)-one (4p):** 96% Yield, White solid (284.89 mg); m.p. 175–176 °C; <sup>1</sup>H NMR

(400 MHz, CDCl<sub>3</sub>)  $\delta$  = 0.91 (s, 3H, CH<sub>3</sub>), 0.98 (s, 3H, CH<sub>3</sub>), 1.92 (s, 3H, CH<sub>3</sub>), 2.10 (d,  $J$  = 8.64 Hz, 2H, CH<sub>2</sub>), 2.28 (s, 1H, CH<sub>2</sub>), 5.04 (s, 1H, CH), 6.55 (s, 1H, NH), 7.14 (d,  $J$  = 3.92 Hz, 4H, ArH), 7.39 – 7.43 (m, 5H, ArH); <sup>13</sup>C NMR (100 MHz, CDCl<sub>3</sub>): 12.16, 27.34, 29.00, 32.59, 42.47, 50.82, 104.26, 111.76, 121.18, 122.87, 124.54, 127.52, 129.21, 129.39, 129.95, 130.91, 131.62, 135.65, 137.90, 144.97, 147.51, 148.89, 195.34; <sup>15</sup>N NMR (40.55 MHz, CDCl<sub>3</sub>)  $\delta$  = 6.55 (s, 1H, NH). HRMS of [C<sub>25</sub>H<sub>24</sub>ClN<sub>3</sub>O +Na]<sup>+</sup> (m/z): 440.0818; Calcd.: 440.0813.

**4-(3,4-Dimethoxyphenyl)-3,7,7-trimethyl-1-phenyl-6,7,8,9-tetrahydro-1H-pyrazolo[3,4-b]quinolin-5(4H)-one (4q):** 96% Yield, Red solid (256.05 mg). m.p. 235–237 °C. <sup>1</sup>H NMR (400 MHz, CDCl<sub>3</sub>)  $\delta$  = 0.94 (s, 3H, CH<sub>3</sub>), 0.98 (s, 3H, CH<sub>3</sub>), 1.99 (s, 3H, CH<sub>3</sub>), 2.11 (d,  $J$  = 17.92 Hz, 2H, CH<sub>2</sub>), 2.33 (d,  $J$  = 19.08 Hz, 2H, CH<sub>2</sub>), 3.73 (s, 3H, OCH<sub>3</sub>), 3.76 (s, 3H, OCH<sub>3</sub>), 5.02 (s, 1H, CH), 6.67 – 6.71 (m, 3H, ArH), 6.81 (s, 1H, NH), 7.40 – 7.46 (m, 5H, ArH); <sup>13</sup>C NMR (100 MHz, CDCl<sub>3</sub>): 12.06, 14.42, 20.59, 29.15, 32.54, 35.52, 42.41, 50.82, 55.79, 104.91, 111.00, 111.74, 119.96, 121.17, 123.01, 127.71, 129.05, 129.97, 135.93, 139.24, 139.28, 147.28, 148.55, 195.61; <sup>15</sup>N NMR (40.55 MHz, CDCl<sub>3</sub>)  $\delta$  = 6.81 (s, 1H, NH). HRMS of [C<sub>27</sub>H<sub>29</sub>N<sub>3</sub>O<sub>3</sub>+H]<sup>+</sup> (m/z): 443.3232; Calcd.: 443.3230.

**4-(Thiophen-2-yl)-3,7,7-trimethyl-1-phenyl-7,8-dihydro-1H-pyrazolo[3,4-b]quinolin-5(4H)-one (4r):** Yield 94%. Yellow solid (326.17 mg); m.p. 218–219 °C; <sup>1</sup>H NMR (400 MHz, CDCl<sub>3</sub>)  $\delta$  = 1.05 (s, 3H, CH<sub>3</sub>), 1.06 (s, 3H, CH<sub>3</sub>), 2.18 (s, 3H, CH<sub>3</sub>), 2.21 (s, 2H, CH<sub>2</sub>), 2.35 (s, 2H, CH<sub>2</sub>), 5.50 (s, 1H, CH), 6.87 (d,  $J$  = 5.24 Hz, 2H, ArH), 7.07 (t,  $J$  = 10 Hz, 2H), 7.34 (s, 1H, NH), 7.47 (d,  $J$  = 3.42 Hz, 4H, ArH); <sup>13</sup>C NMR (100 MHz, CDCl<sub>3</sub>): 12.12, 27.30, 29.17, 30.58, 32.51, 42.23, 50.75, 104.13, 111.58, 121.21, 123.00, 123.54, 123.63, 126.42, 127.58, 129.90, 135.80, 137.73, 147.45, 149.22, 151.11, 195.45; <sup>15</sup>N NMR (40.55 MHz, CDCl<sub>3</sub>)  $\delta$  = 7.34 (s, 1H, NH).



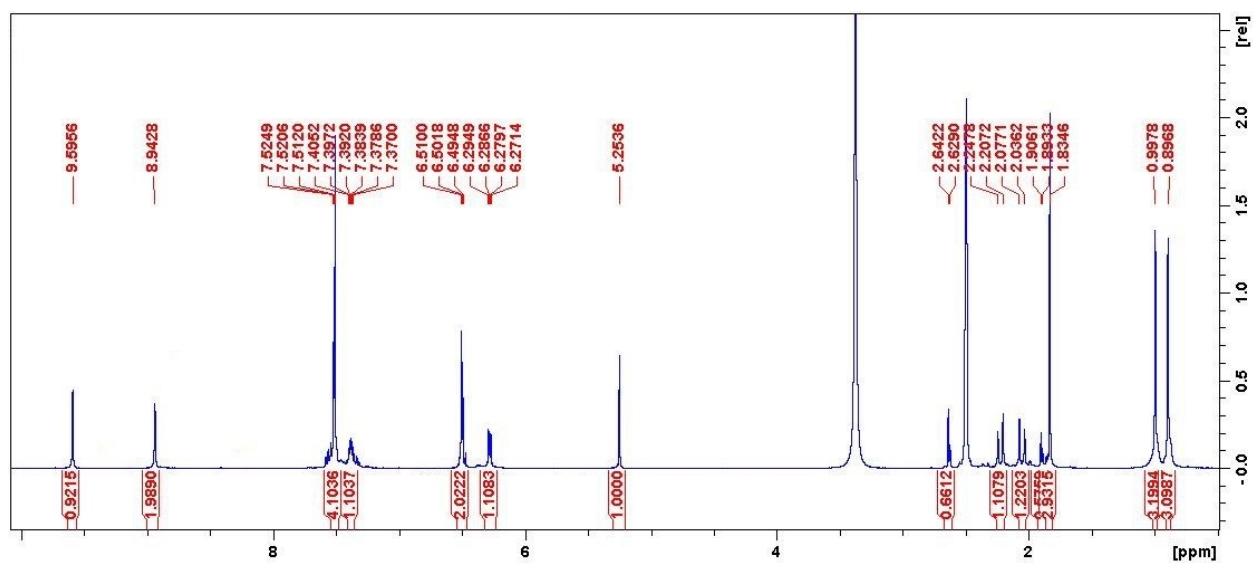

<sup>1</sup>H NMR spectra of compound 4a

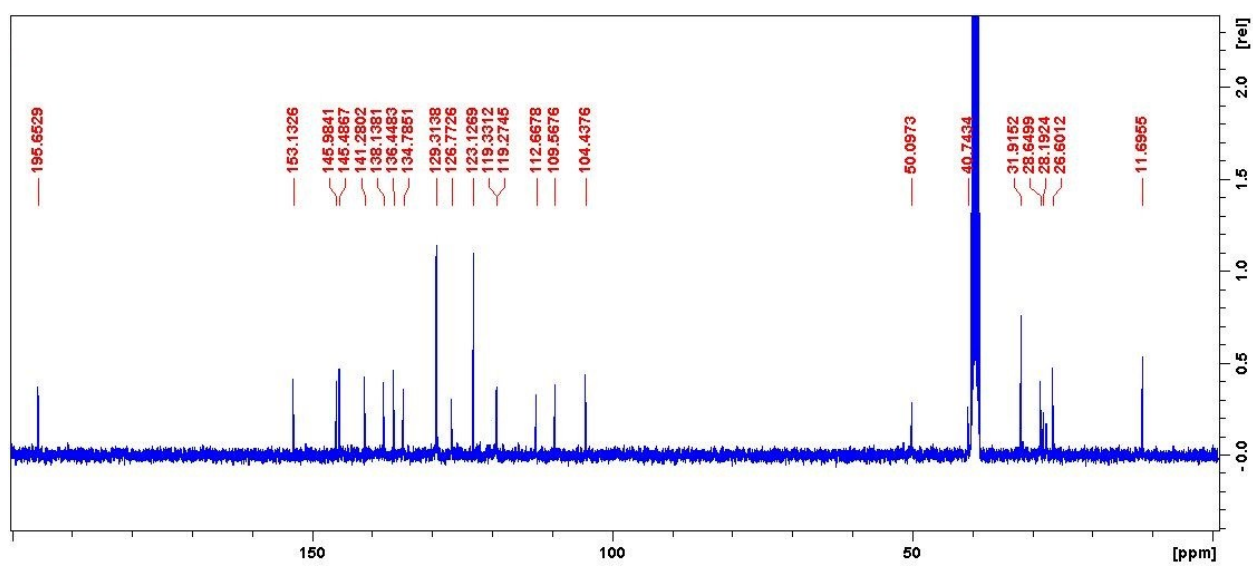

<sup>13</sup>C NMR spectra of compound 4a

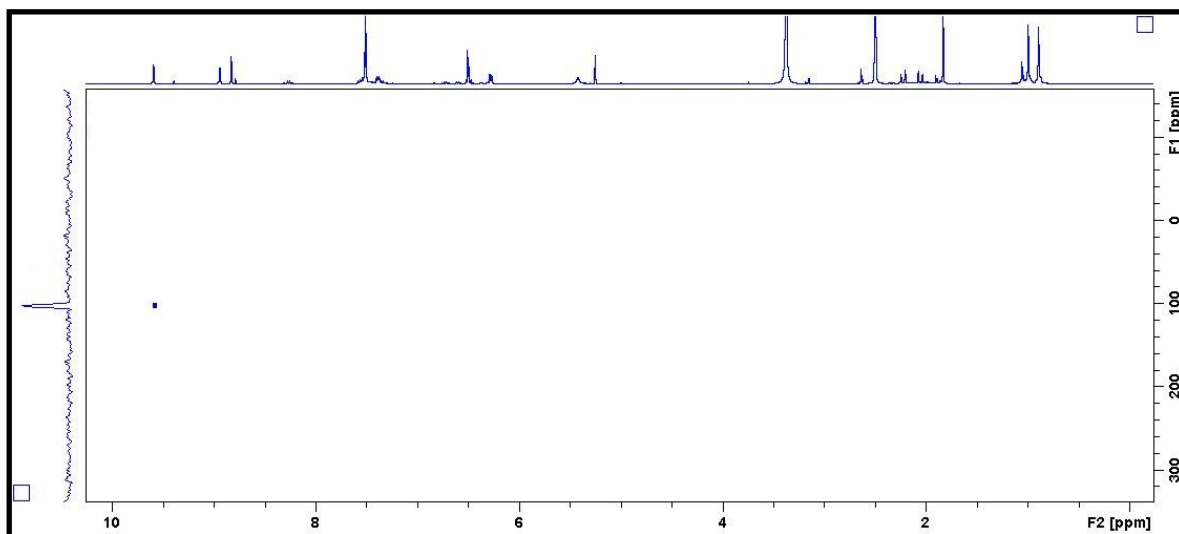

$^{15}\text{N}$  NMR spectra of compound **4a**

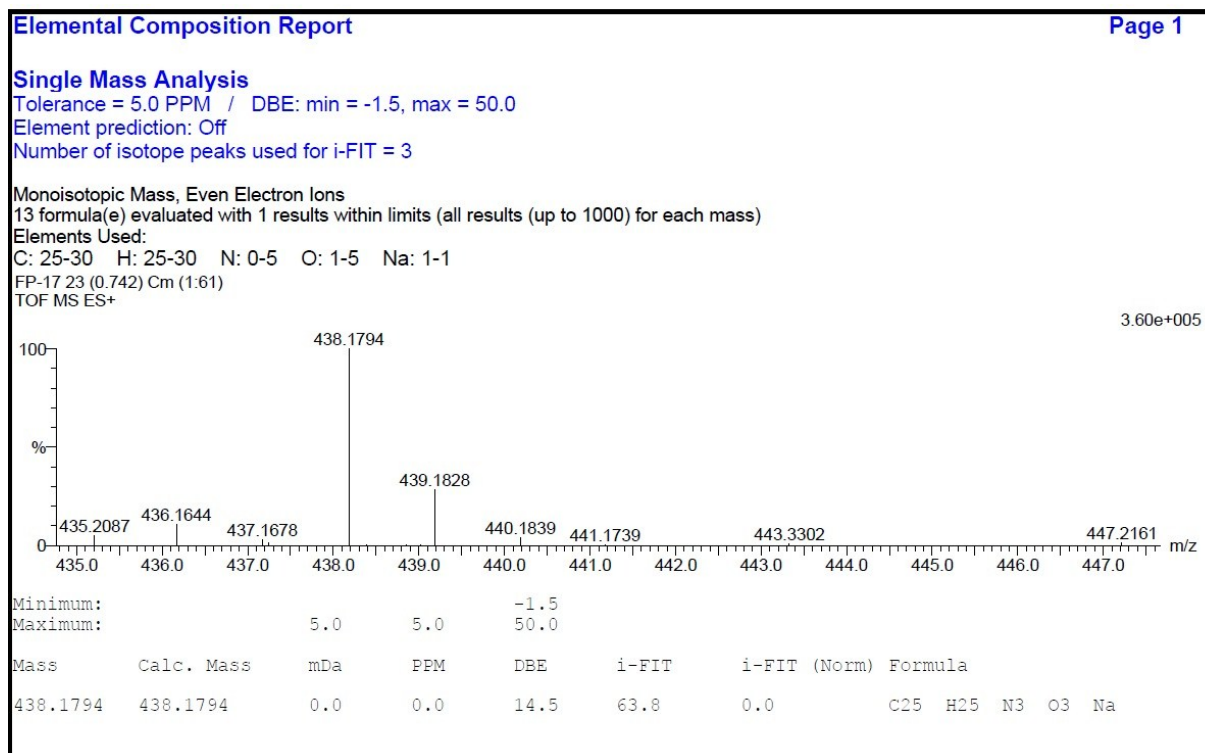

HRMS spectra of compound **4a**

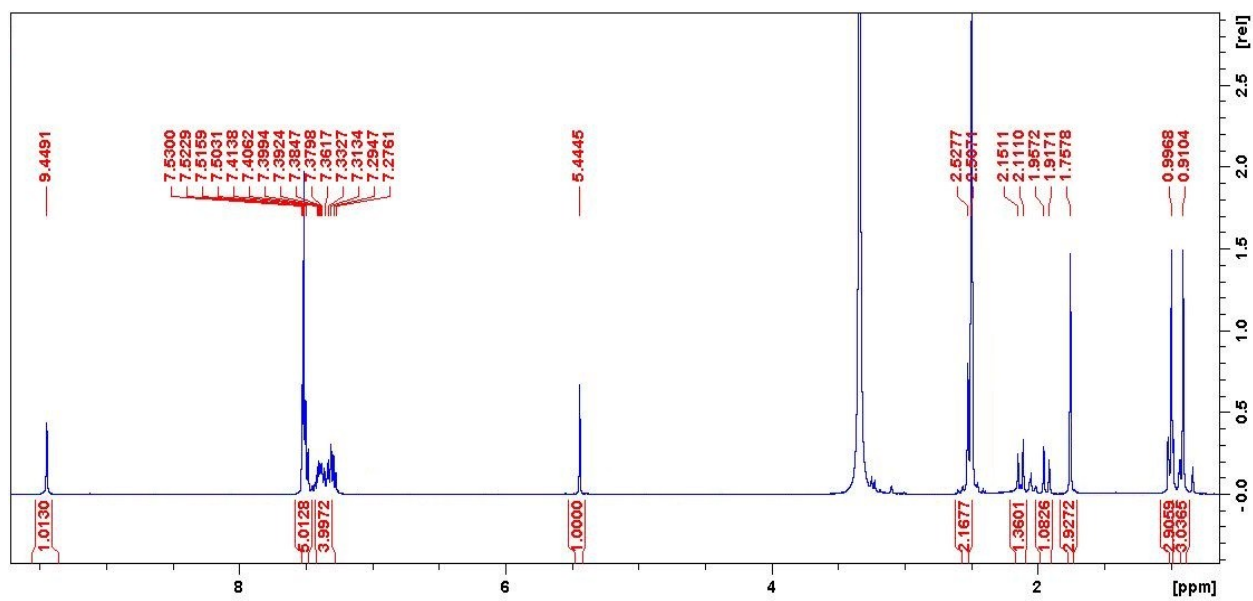

<sup>1</sup>H NMR spectra of compound **4b**

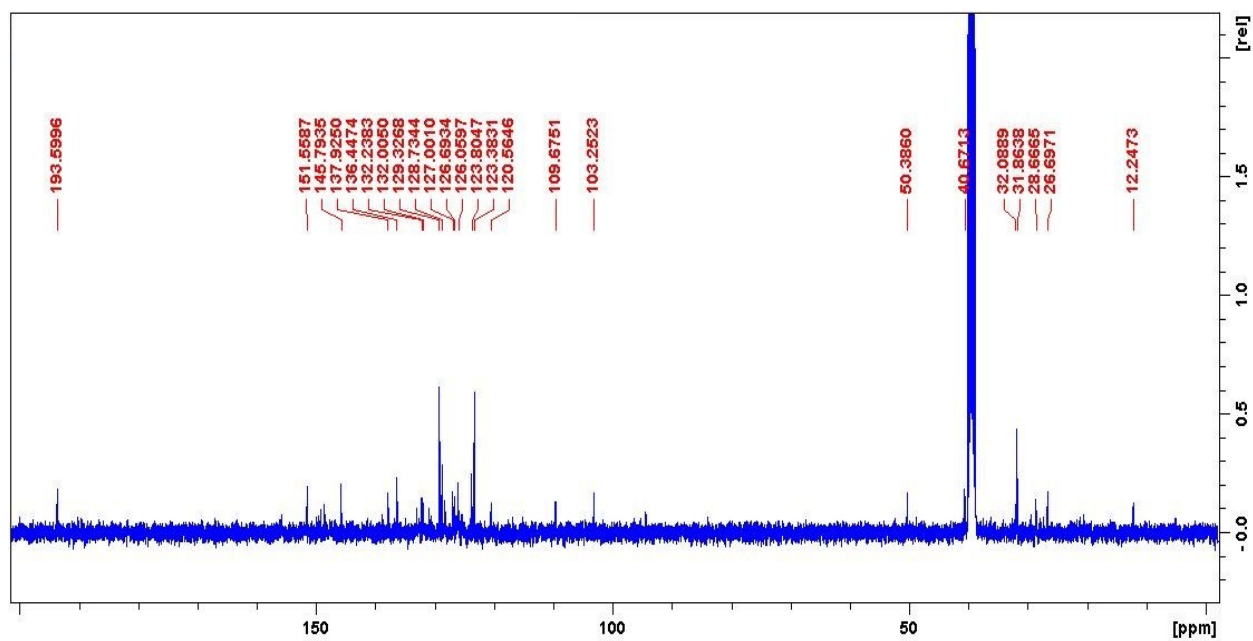

<sup>13</sup>C NMR spectra of compound **4b**

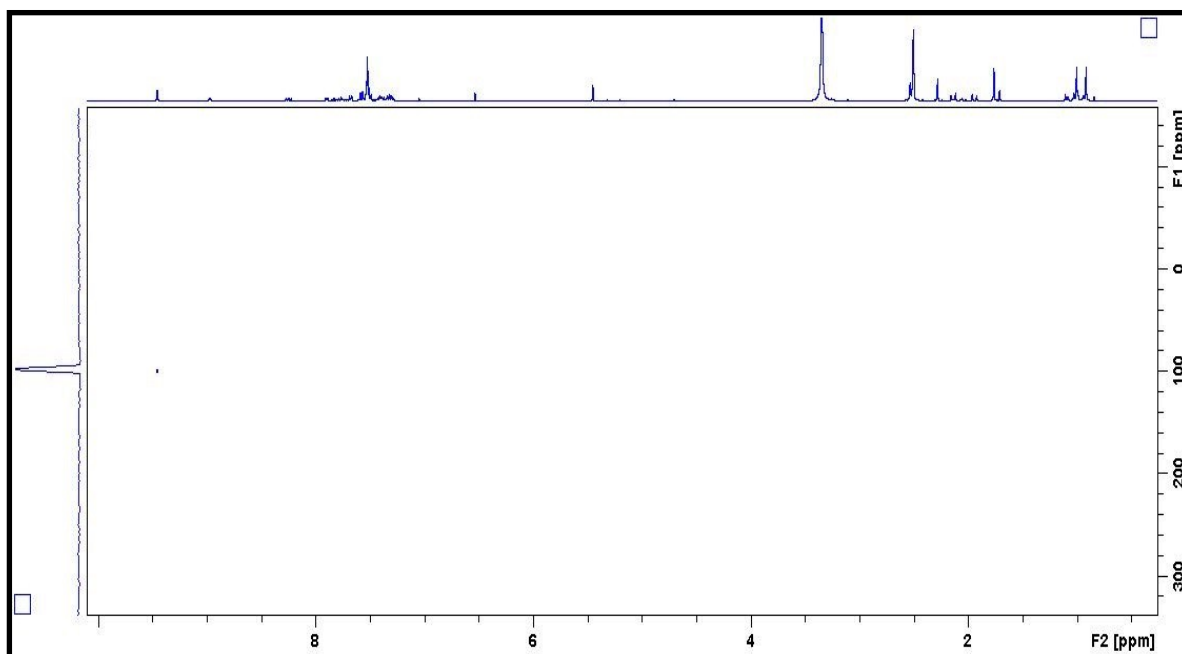

<sup>15</sup>N NMR spectra of compound **4b**

**Elemental Composition Report**

**Single Mass Analysis**

Tolerance = 5.0 PPM / DBE: min = -1.5, max = 50.0

Element prediction: Off

Number of isotope peaks used for i-FIT = 3

Monoisotopic Mass, Even Electron Ions

82 formula(e) evaluated with 1 results within limits (all results (up to 1000) for each mass)

Elements Used:

C: 25-30 H: 20-25 N: 0-5 O: 1-5 Na: 1-1 F: 1-5

FP-13 22 (0.709) Cm (1.61)

TOF MS ES+

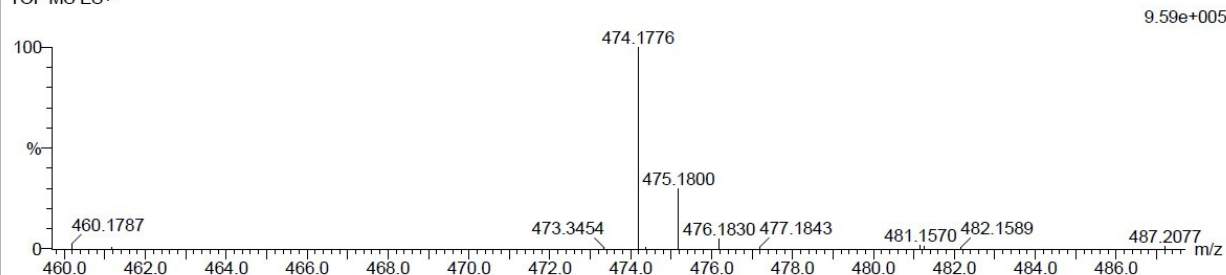

Minimum: -1.5  
Maximum: 5.0 5.0 50.0

| Mass     | Calc. Mass | mDa | PPM | DBE  | i-FIT | i-FIT (Norm) | Formula                                                            |
|----------|------------|-----|-----|------|-------|--------------|--------------------------------------------------------------------|
| 474.1776 | 474.1769   | 0.7 | 1.5 | 14.5 | 33.4  | 0.0          | C <sub>26</sub> H <sub>24</sub> N <sub>3</sub> O Na F <sub>3</sub> |

### HRMS spectra of compound 4b

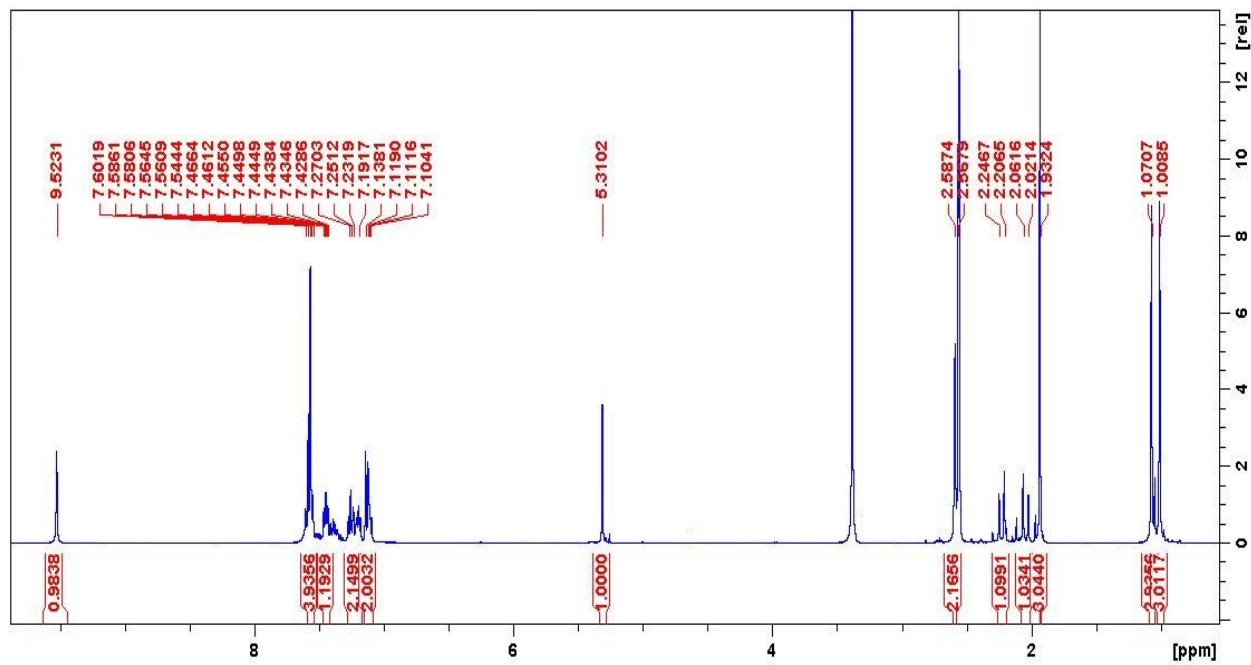

### <sup>1</sup>H NMR spectra of compound 4c

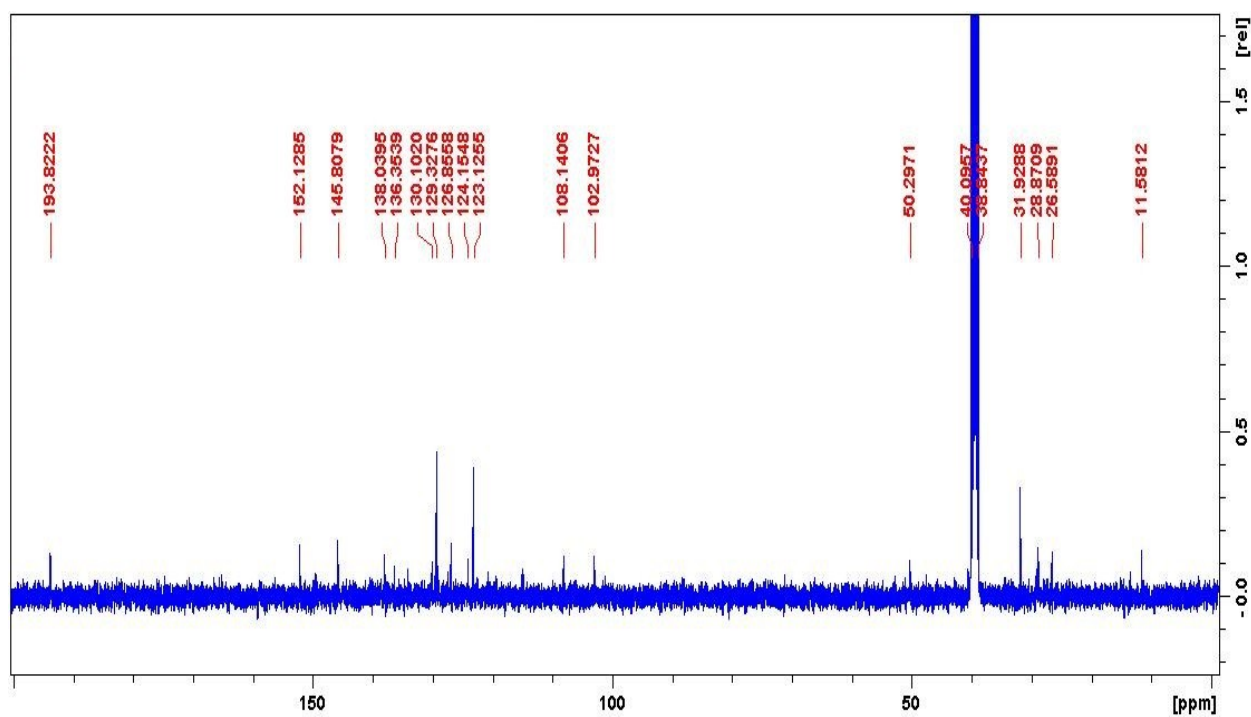

### <sup>13</sup>C NMR spectra of compound 4c

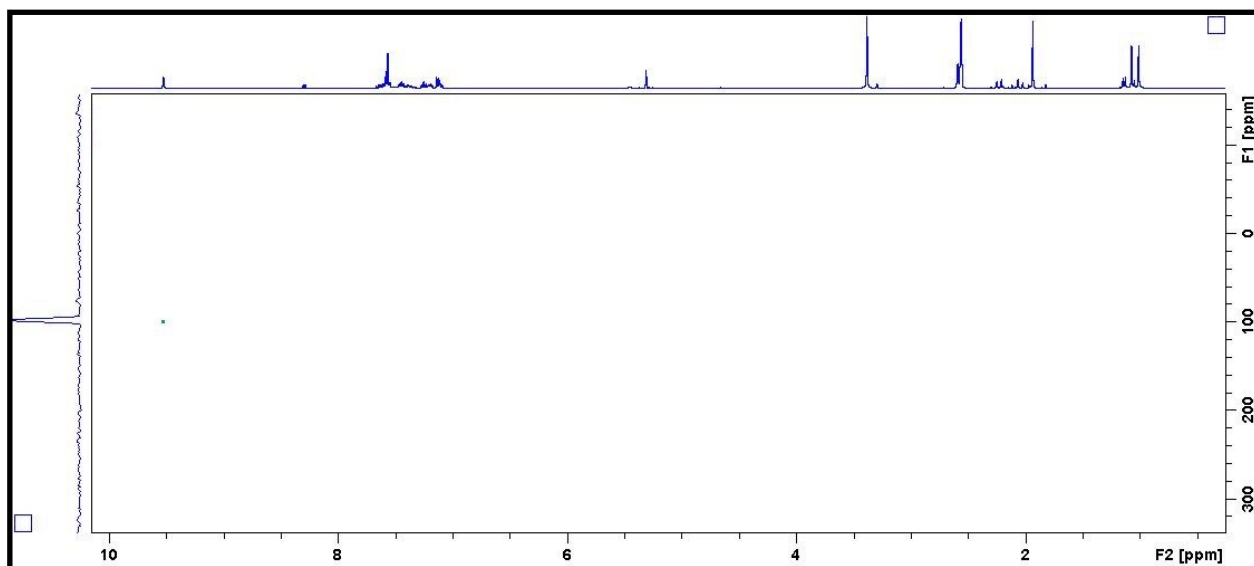

<sup>15</sup>N NMR spectra of compound **4c**

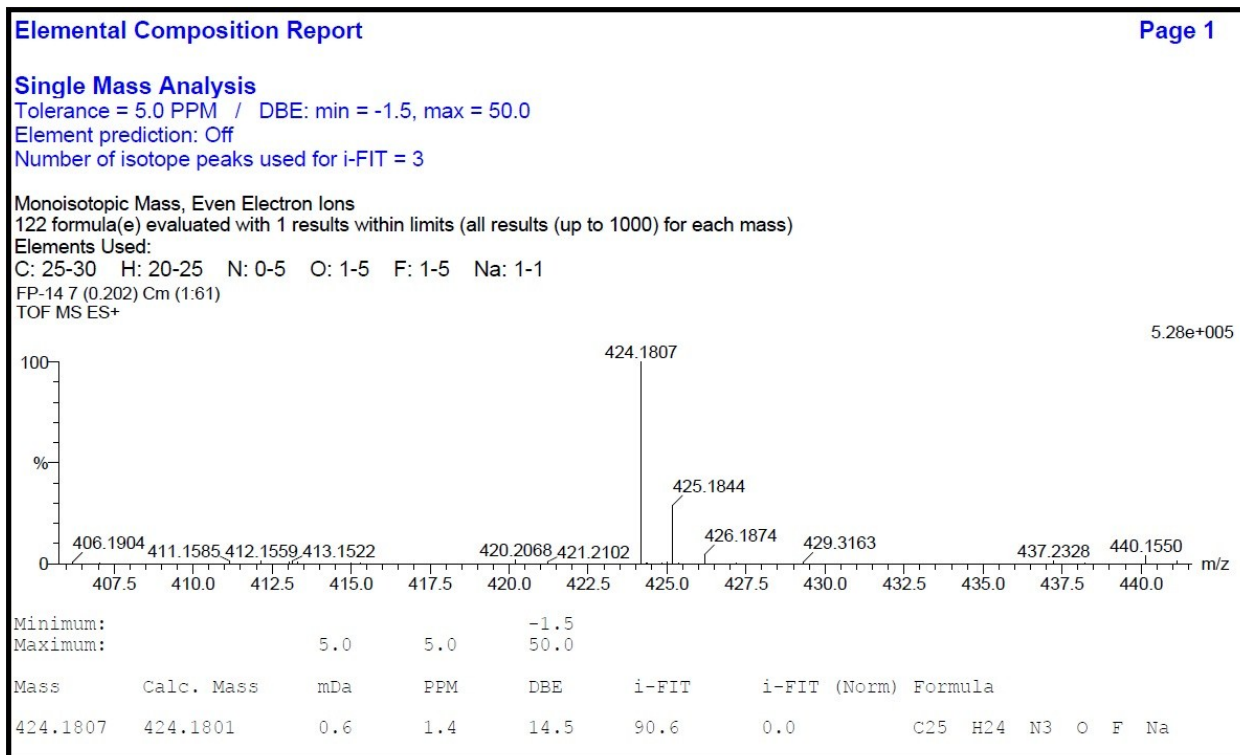

HRMS spectra of compound **4c**

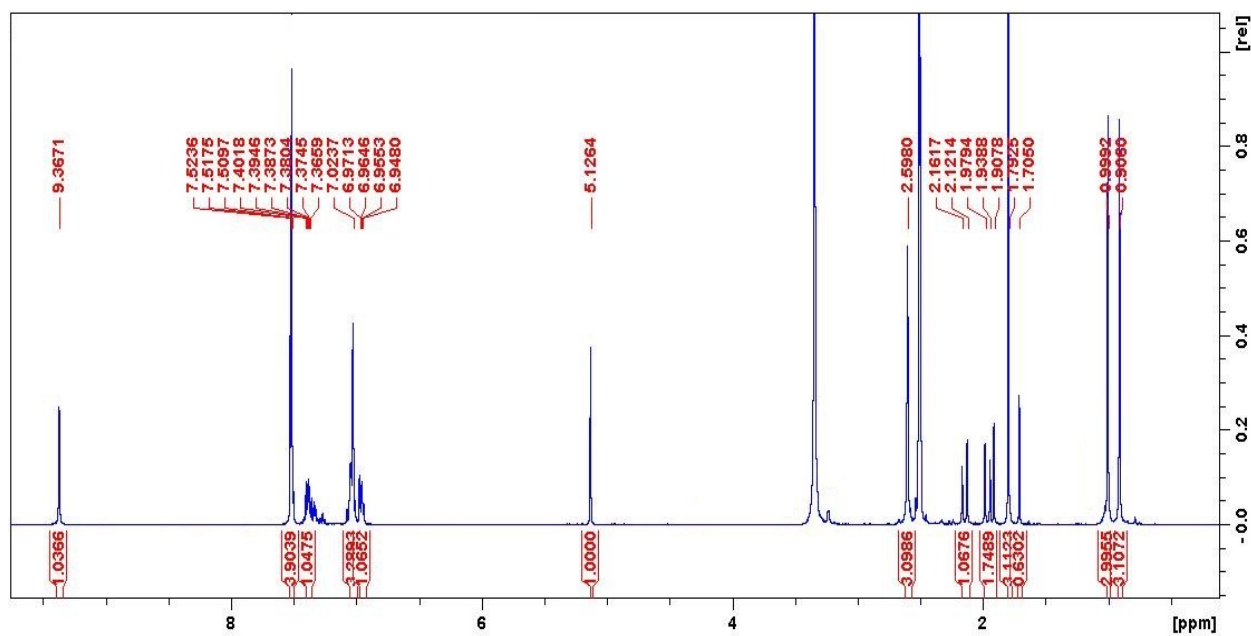

<sup>1</sup>H NMR spectra of compound 4d

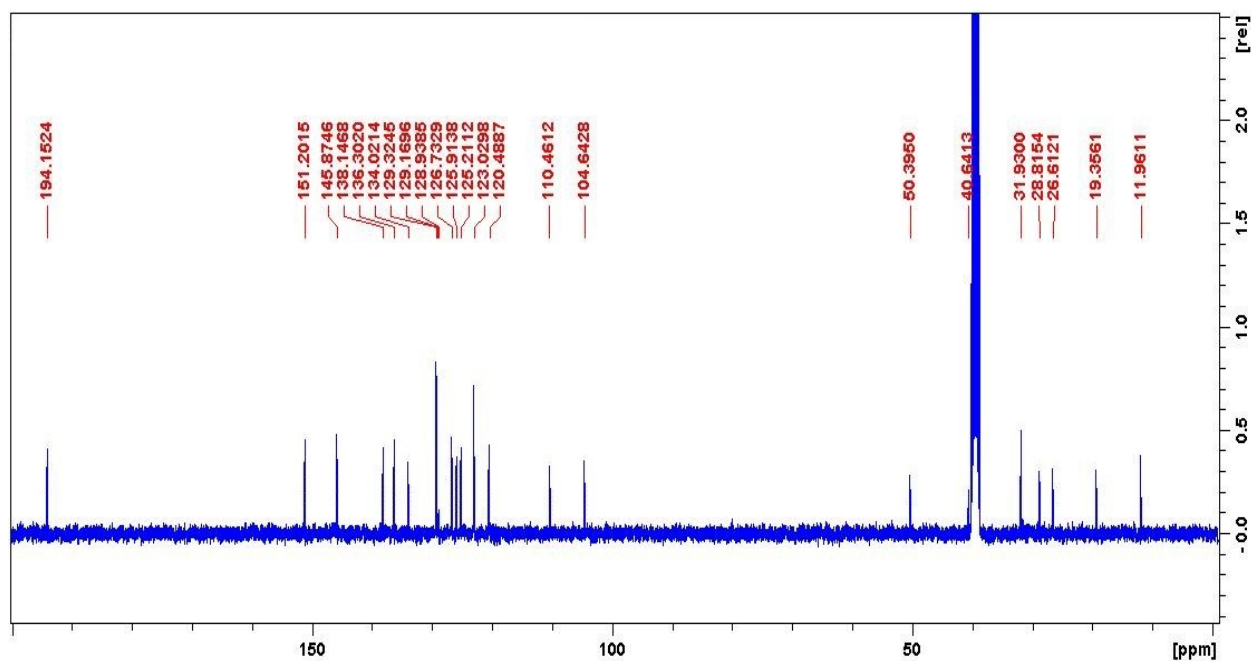

<sup>13</sup>C NMR spectra of compound 4d

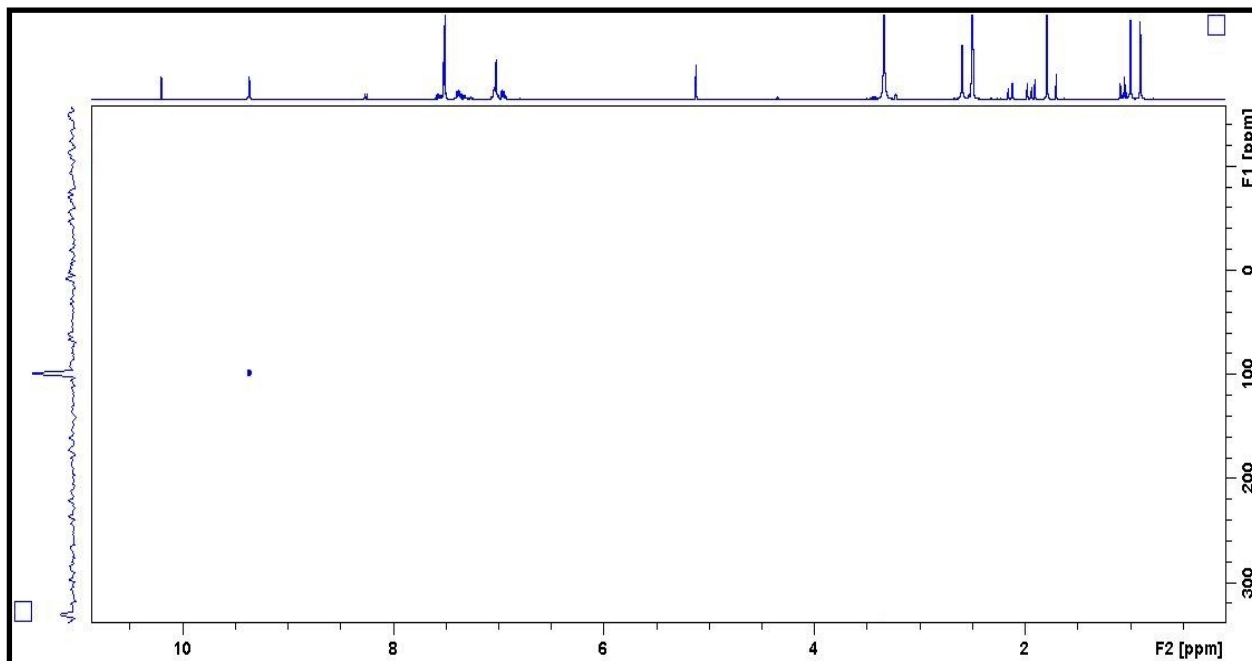

<sup>15</sup>N NMR spectra of compound **4d**

**Elemental Composition Report**

**Single Mass Analysis**

Tolerance = 5.0 PPM / DBE: min = -1.5, max = 50.0

Element prediction: Off

Number of isotope peaks used for i-FIT = 3

Monoisotopic Mass, Even Electron Ions

18 formula(e) evaluated with 1 results within limits (all results (up to 1000) for each mass)

Elements Used:

C: 25-30 H: 25-30 N: 0-5 O: 0-5 Na: 1-1

FP-12 2 (0.034) Cm (1:61)

TOF MS ES+

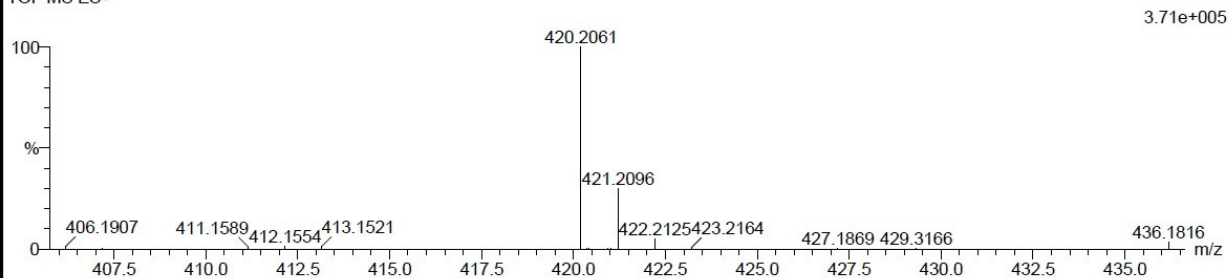

Minimum: -1.5  
Maximum: 5.0 5.0 50.0

| Mass     | Calc. Mass | mDa | PPM | DBE  | i-FIT | i-FIT (Norm) | Formula         |
|----------|------------|-----|-----|------|-------|--------------|-----------------|
| 420.2061 | 420.2052   | 0.9 | 2.1 | 14.5 | 70.5  | 0.0          | C26 H27 N3 O Na |



### HRMS spectra of compound 4d

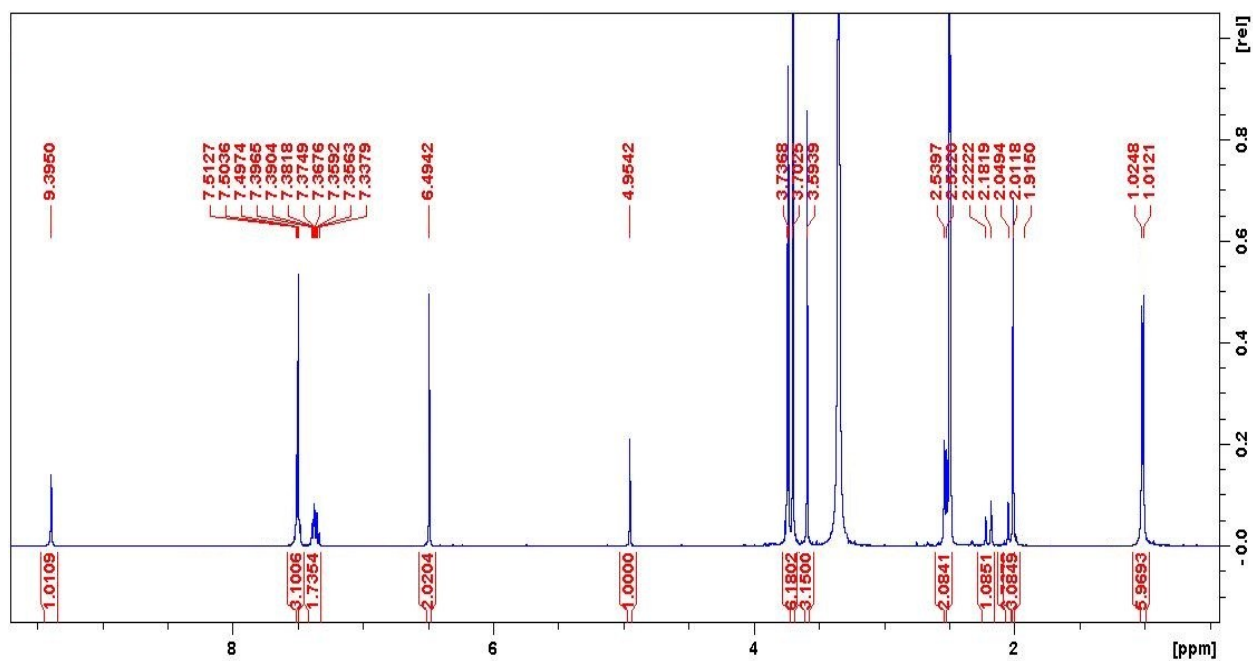

### <sup>1</sup>H NMR spectra of compound 4e

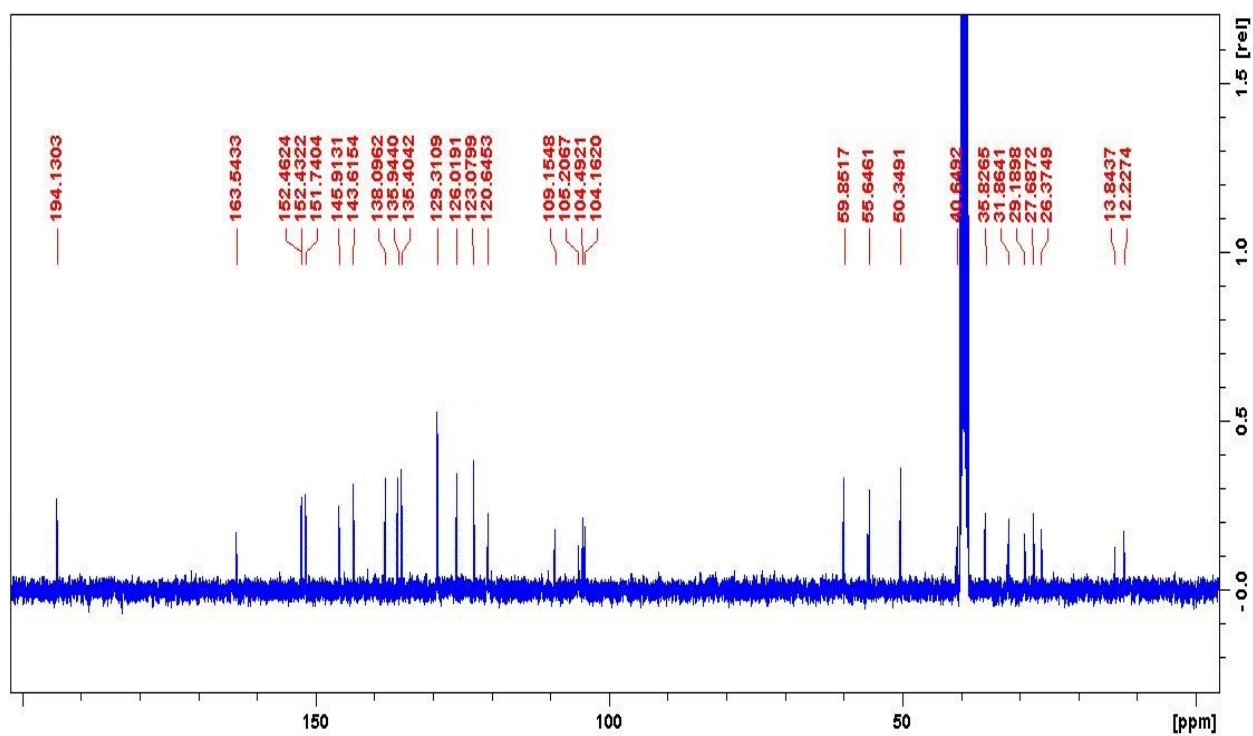

### <sup>13</sup>C NMR spectra of compound 4e

Elemental Composition Report

Single Mass Analysis

Tolerance = 5.0 PPM / DBE: min = -1.5, max = 50.0

Element prediction: Off

Number of isotope peaks used for i-FIT = 3

Monoisotopic Mass, Even Electron Ions

9 formula(e) evaluated with 1 results within limits (all results (up to 1000) for each mass)

Elements Used:

C: 25-30 H: 30-35 N: 0-5 O: 1-5 Na: 1-1

FP-18 17 (0.540) Cm (1:61)

TOF MS ES+

1.98e+005

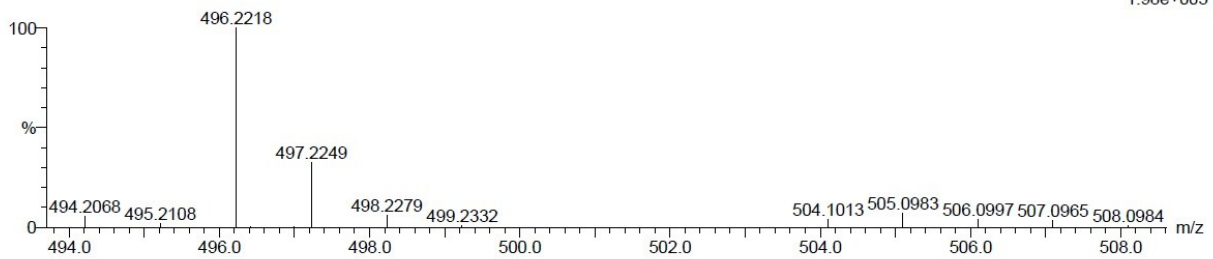

Minimum:

Maximum: 5.0 5.0 50.0

| Mass     | Calc. Mass | mDa | PPM | DBE  | i-FIT | i-FIT (Norm) | Formula          |
|----------|------------|-----|-----|------|-------|--------------|------------------|
| 496.2218 | 496.2212   | 0.6 | 1.2 | 14.5 | 38.0  | 0.0          | C28 H31 N3 O4 Na |

HRMS spectra of compound 4e

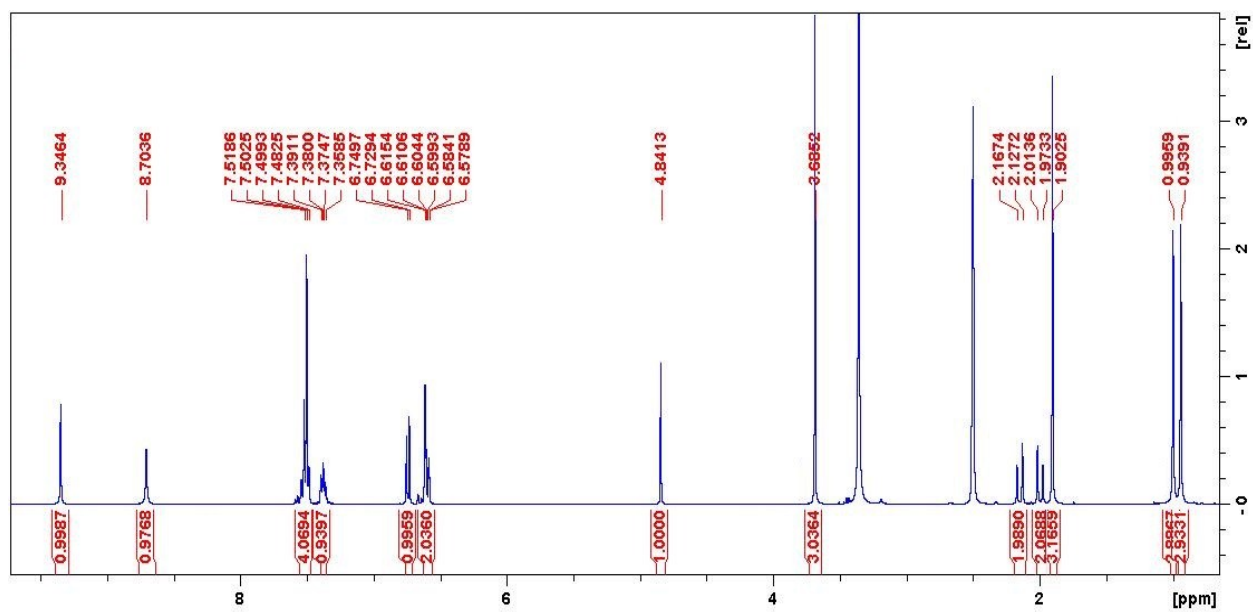

<sup>1</sup>H NMR spectra of compound 4f

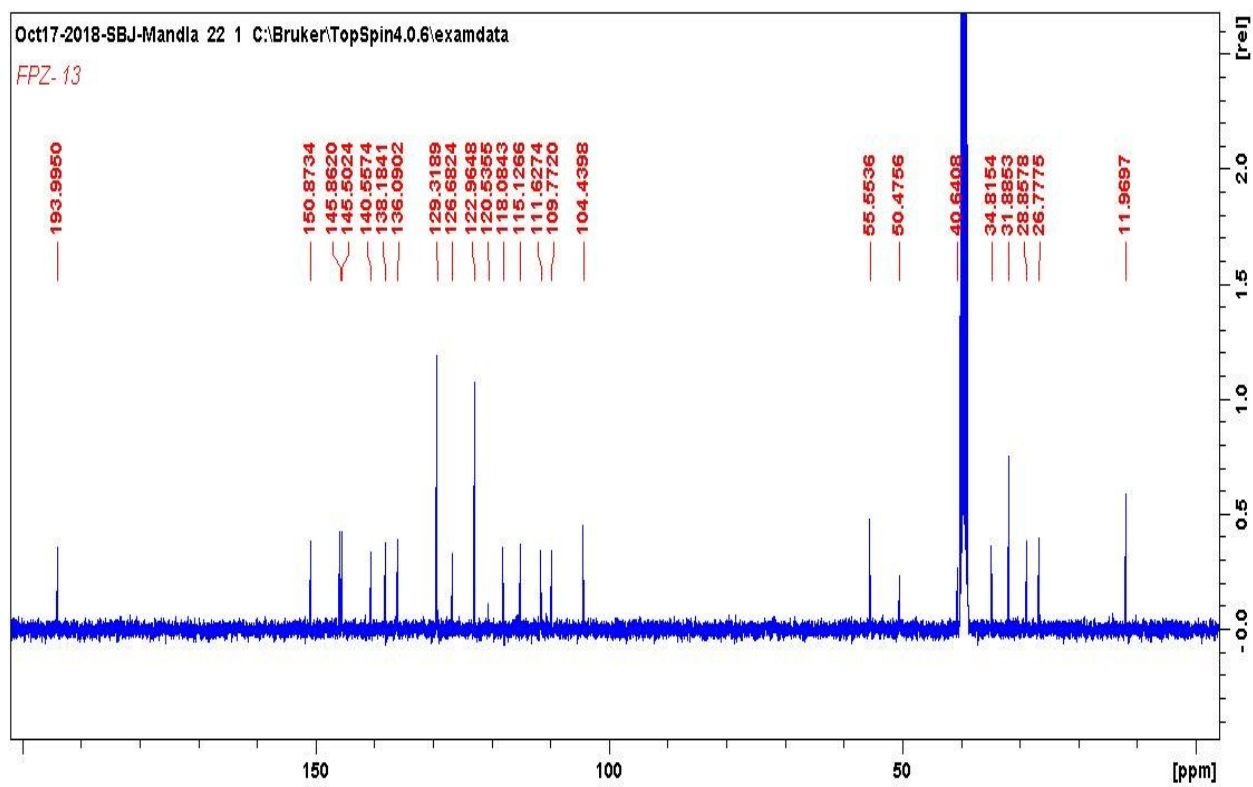

<sup>13</sup>C NMR spectra of compound 4f

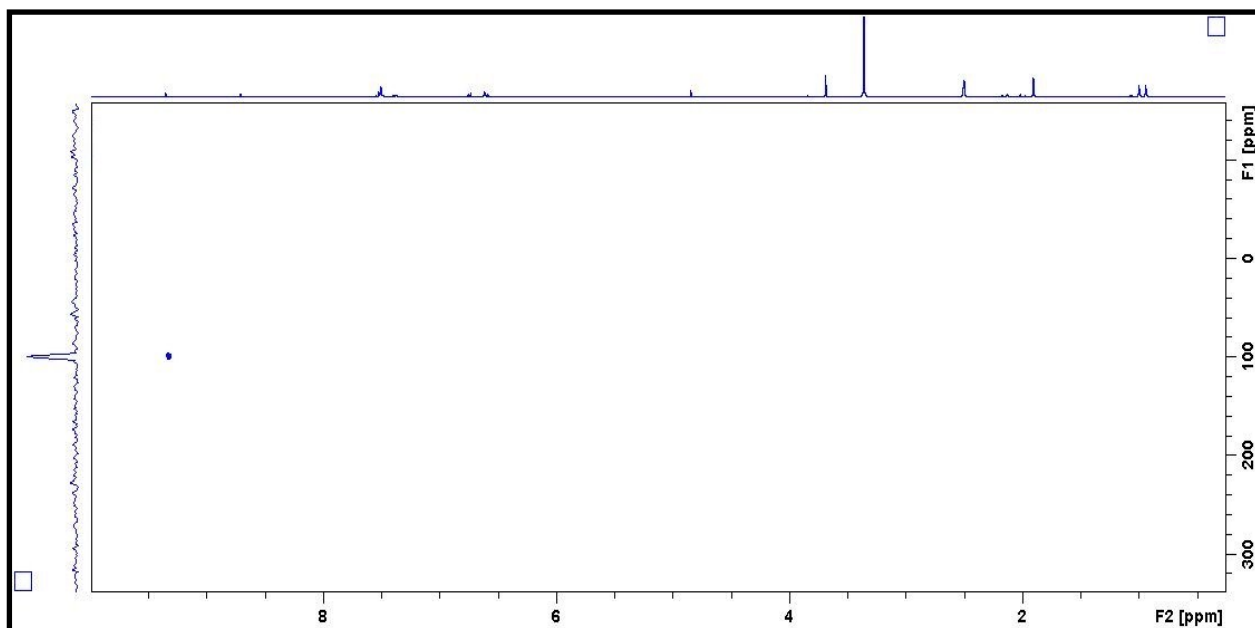

$^{15}\text{N}$  NMR spectra of compound **4f**

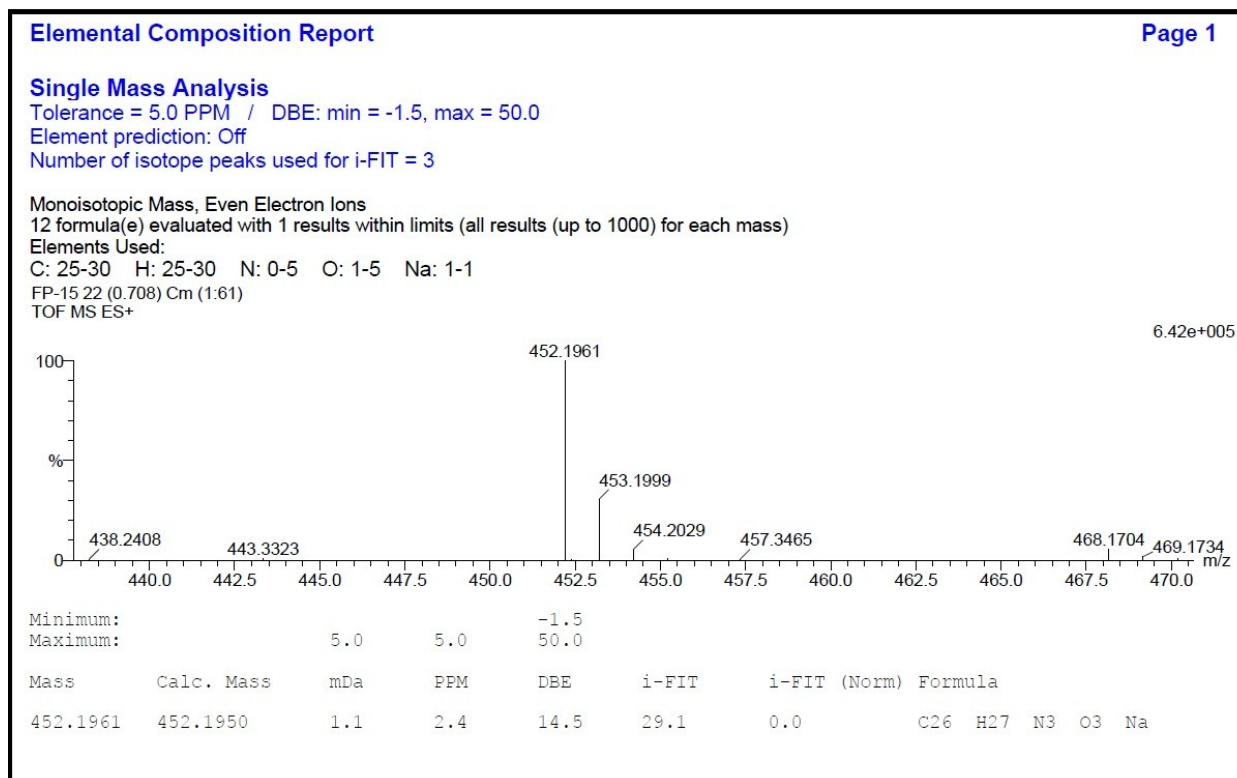

HRMS spectra of compound **4f**

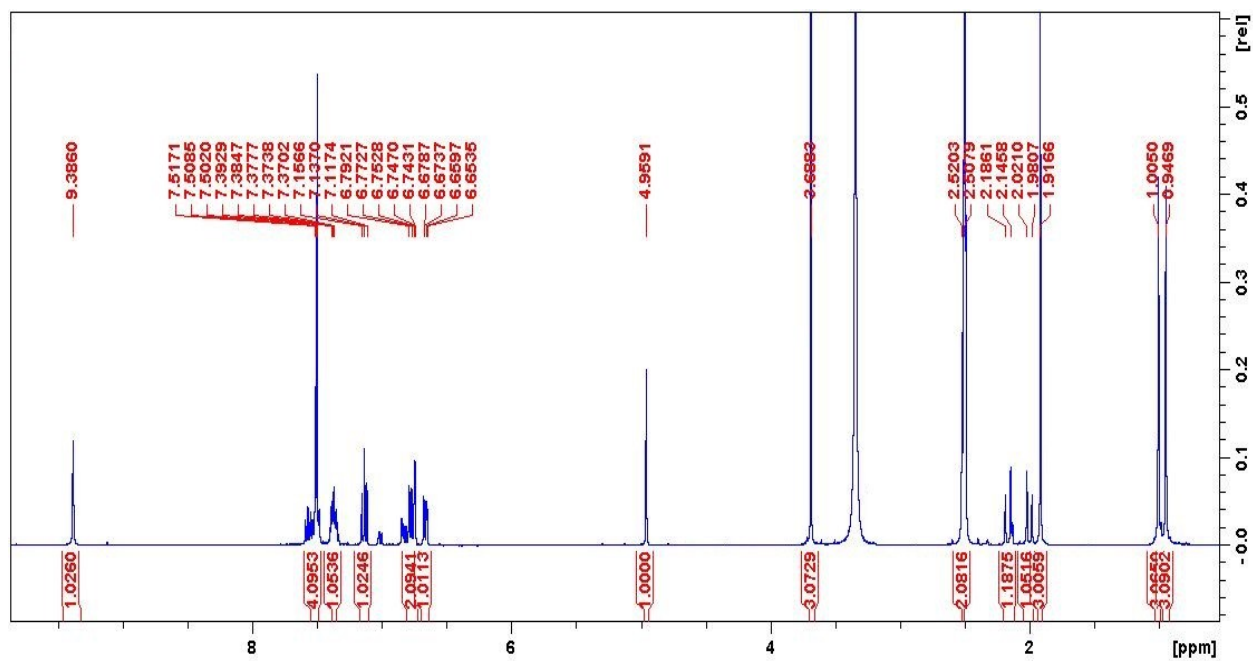

<sup>1</sup>H NMR spectra of compound 4g

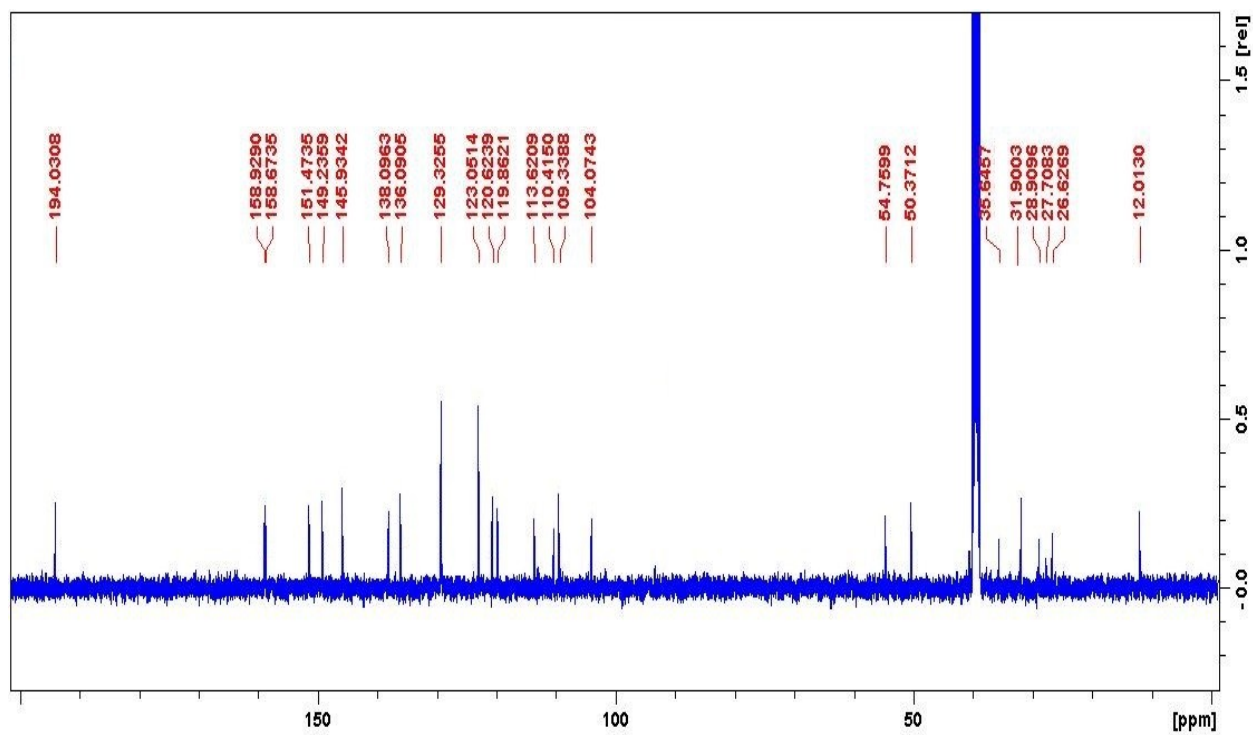

### <sup>13</sup>C NMR spectra of compound 4g

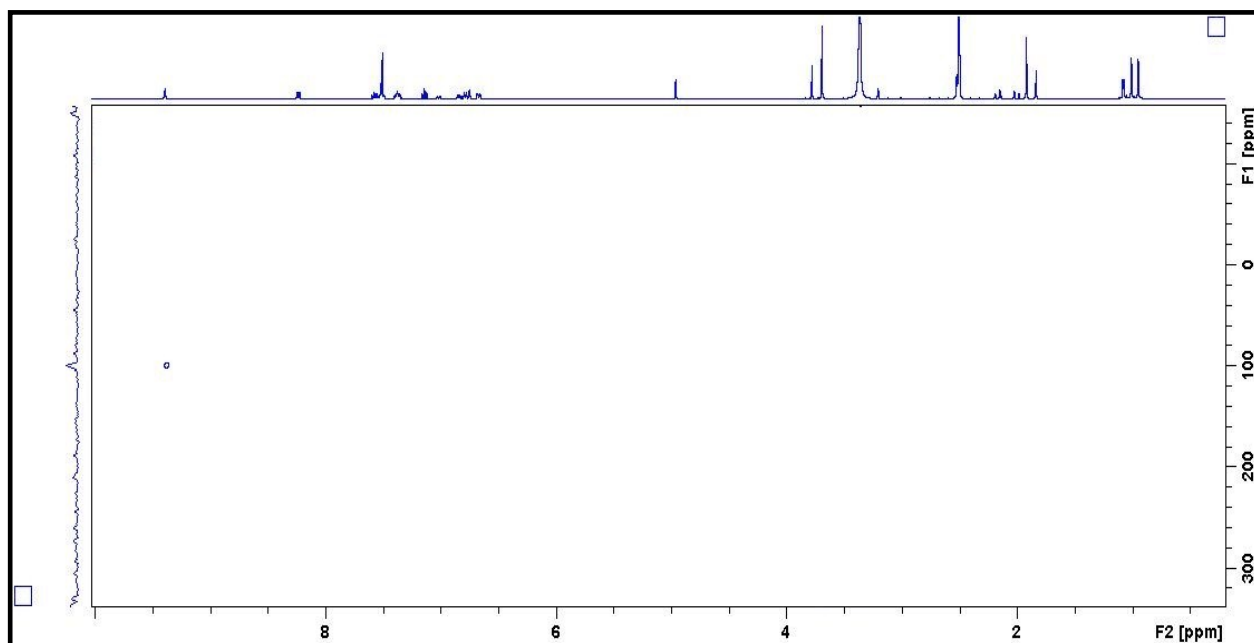

### <sup>15</sup>N NMR spectra of compound 4g

#### Elemental Composition Report

Page 1

#### Single Mass Analysis

Tolerance = 5.0 PPM / DBE: min = -1.5, max = 50.0

Element prediction: Off

Number of isotope peaks used for i-FIT = 3

Monoisotopic Mass, Even Electron Ions

14 formula(e) evaluated with 1 results within limits (all results (up to 1000) for each mass)

Elements Used:

C: 25-30 H: 25-30 N: 0-5 O: 1-5 Na: 1-1

FP-20 34 (1.113) Cm (1:61)

TOF MS ES+

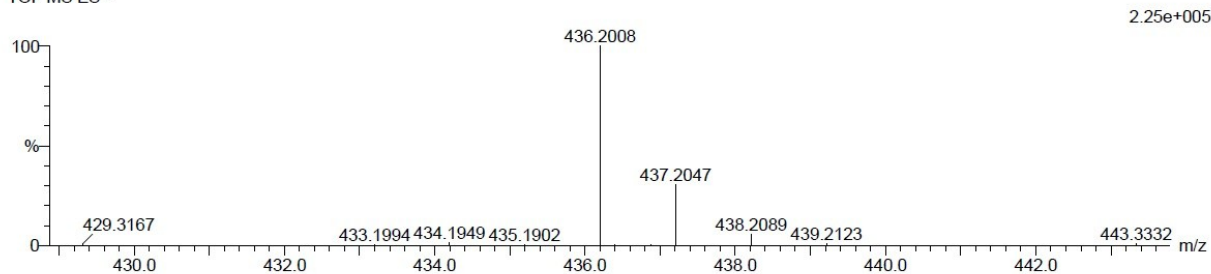

Minimum: -1.5  
Maximum: 5.0 5.0 50.0

| Mass     | Calc. Mass | mDa | PPM | DBE  | i-FIT | i-FIT (Norm) | Formula          |
|----------|------------|-----|-----|------|-------|--------------|------------------|
| 436.2008 | 436.2001   | 0.7 | 1.6 | 14.5 | 47.4  | 0.0          | C26 H27 N3 O2 Na |

# HRMS spectra of compound 4g

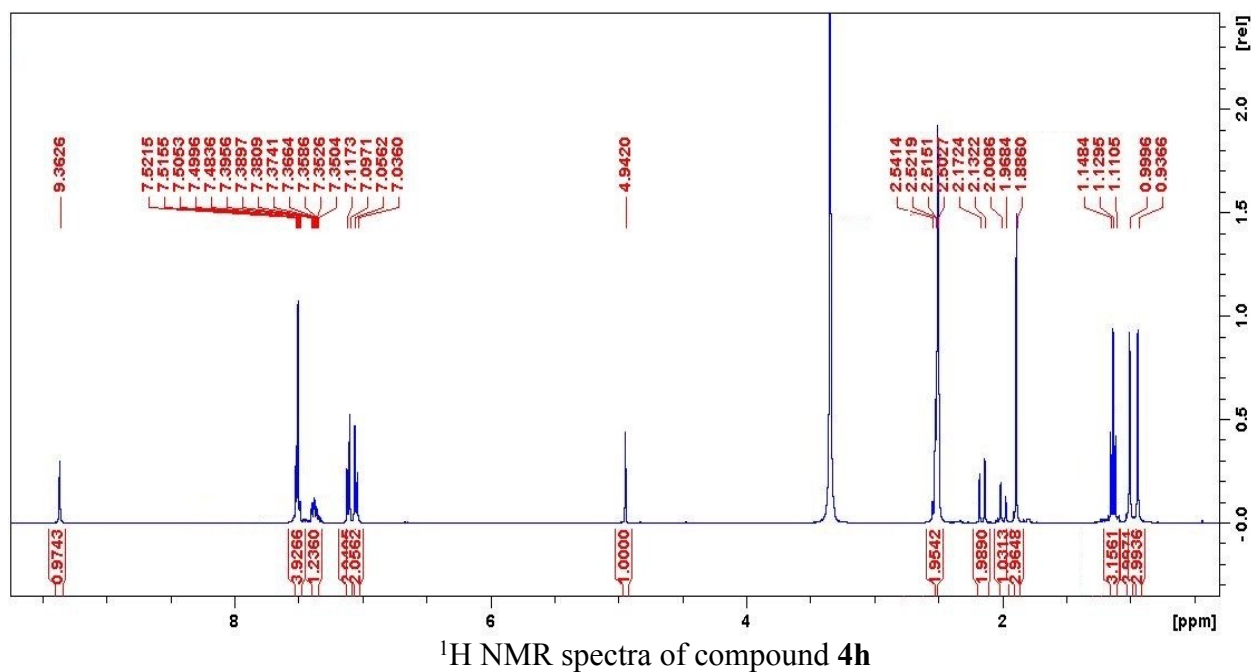

<sup>1</sup>H NMR spectra of compound 4h

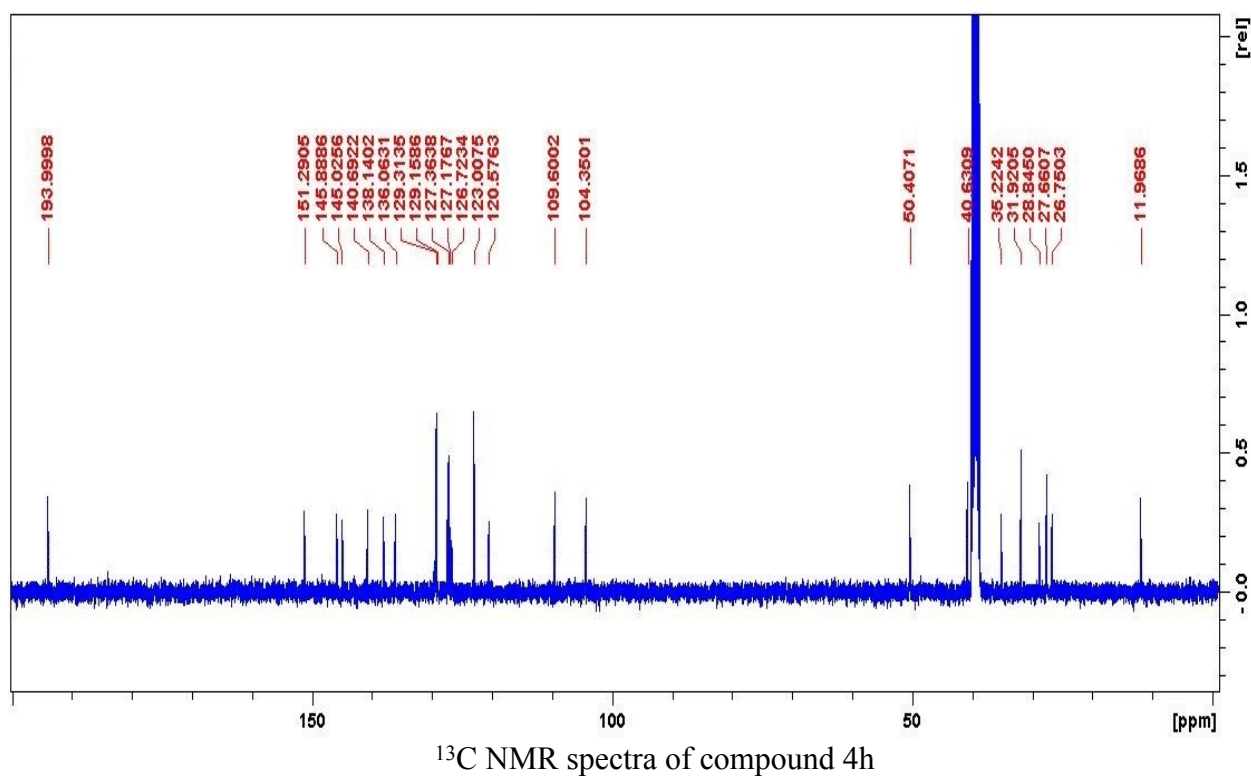

<sup>13</sup>C NMR spectra of compound 4h

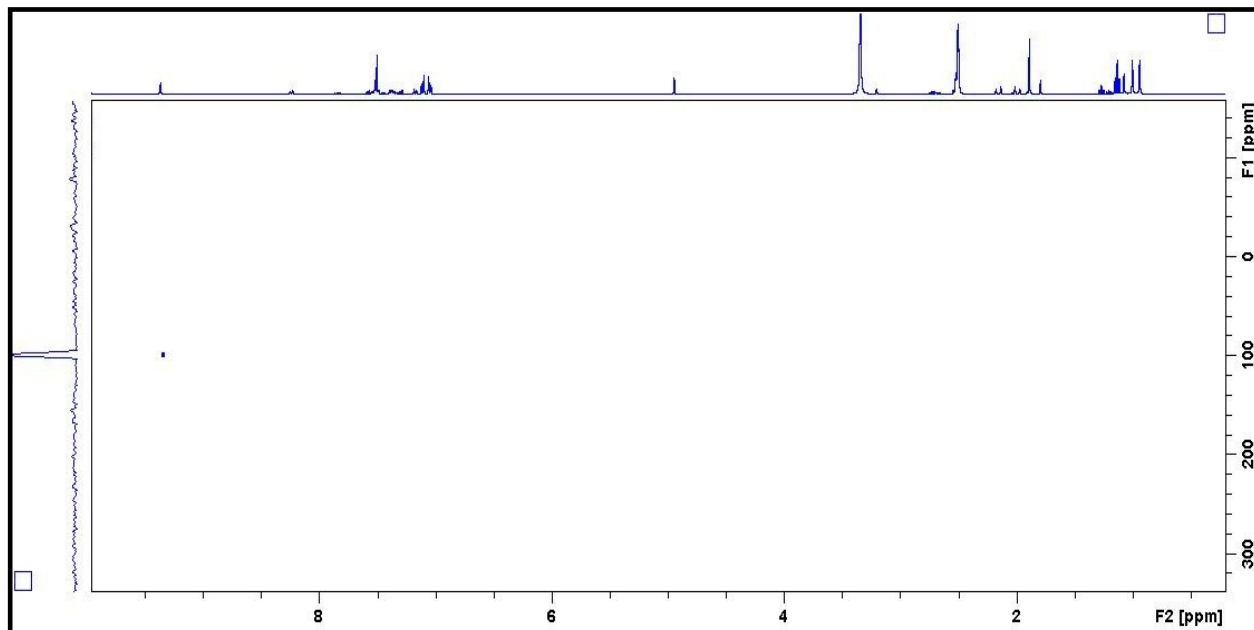

<sup>15</sup>N NMR spectra of compound **4h**

**Elemental Composition Report**

**Single Mass Analysis**

Tolerance = 5.0 PPM / DBE: min = -1.5, max = 50.0

Element prediction: Off

Number of isotope peaks used for i-FIT = 3

Monoisotopic Mass, Even Electron Ions

14 formula(e) evaluated with 1 results within limits (all results (up to 1000) for each mass)

Elements Used:

C: 25-30 H: 25-30 N: 0-5 O: 1-5 Na: 1-1

FP-16 49 (1.619) Cm (1.61)

TOF MS ES+

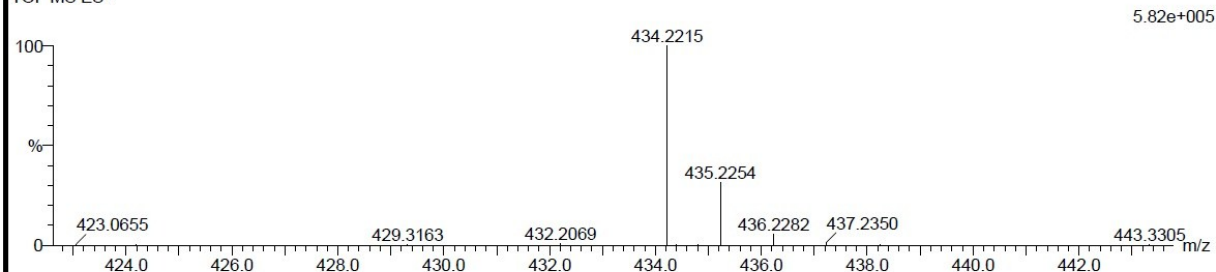

Minimum:

Maximum: 5.0 5.0 -1.5

Mass Calc. Mass mDa PPM DBE i-FIT i-FIT (Norm) Formula

434.2215 434.2208 0.7 1.6 14.5 47.0 0.0 C27 H29 N3 O Na

HRMS spectra of compound **4h**



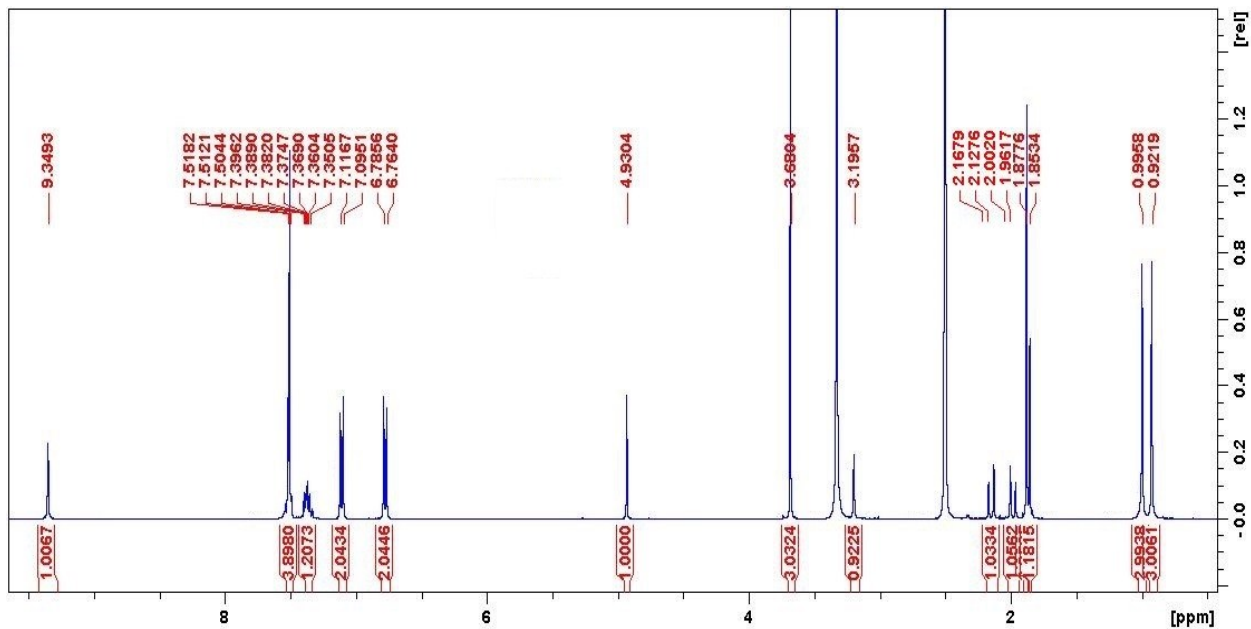

<sup>1</sup>H NMR spectra of compound 4i

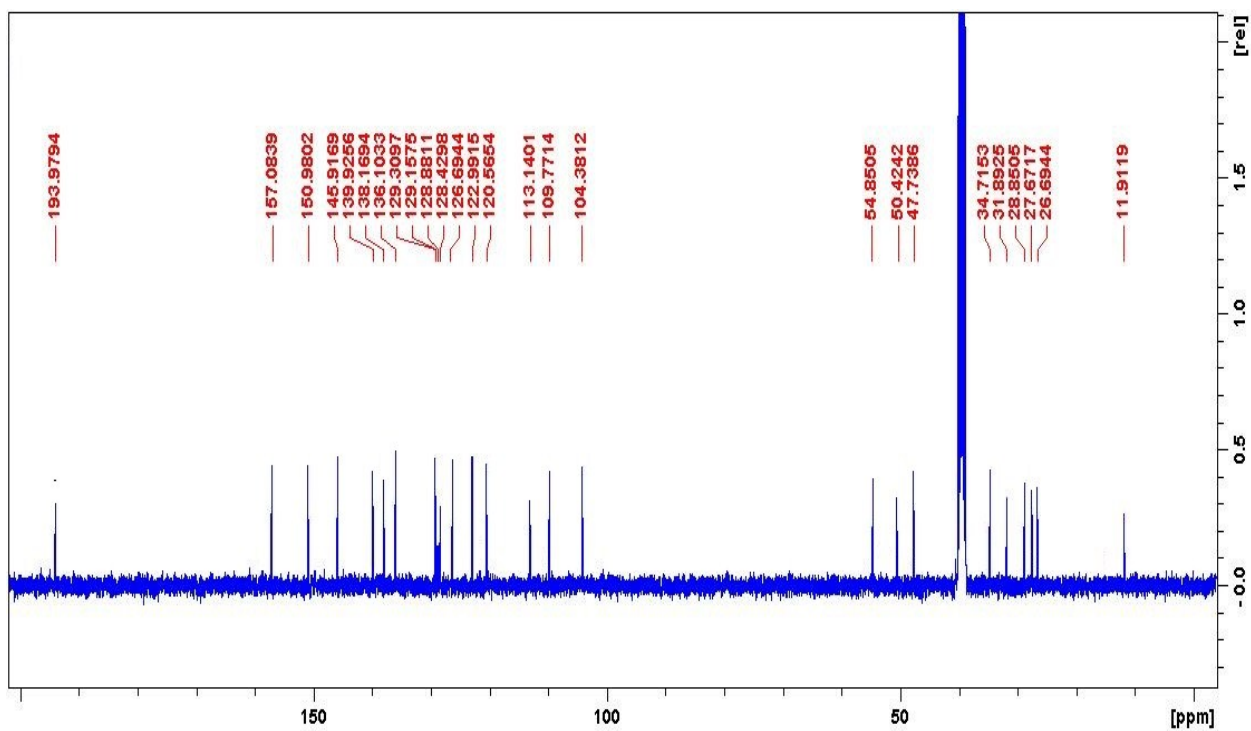

<sup>13</sup>C NMR spectra of compound 4i

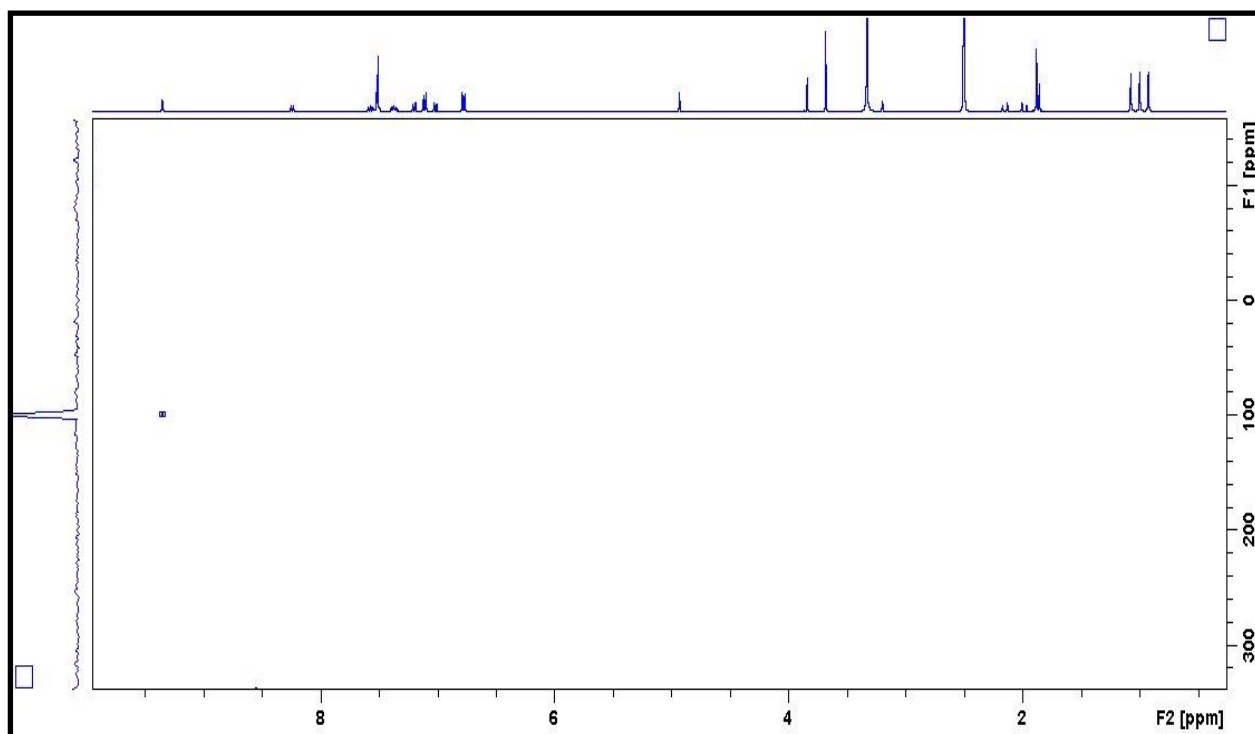

$^{15}\text{N}$  NMR spectra of compound **4i**

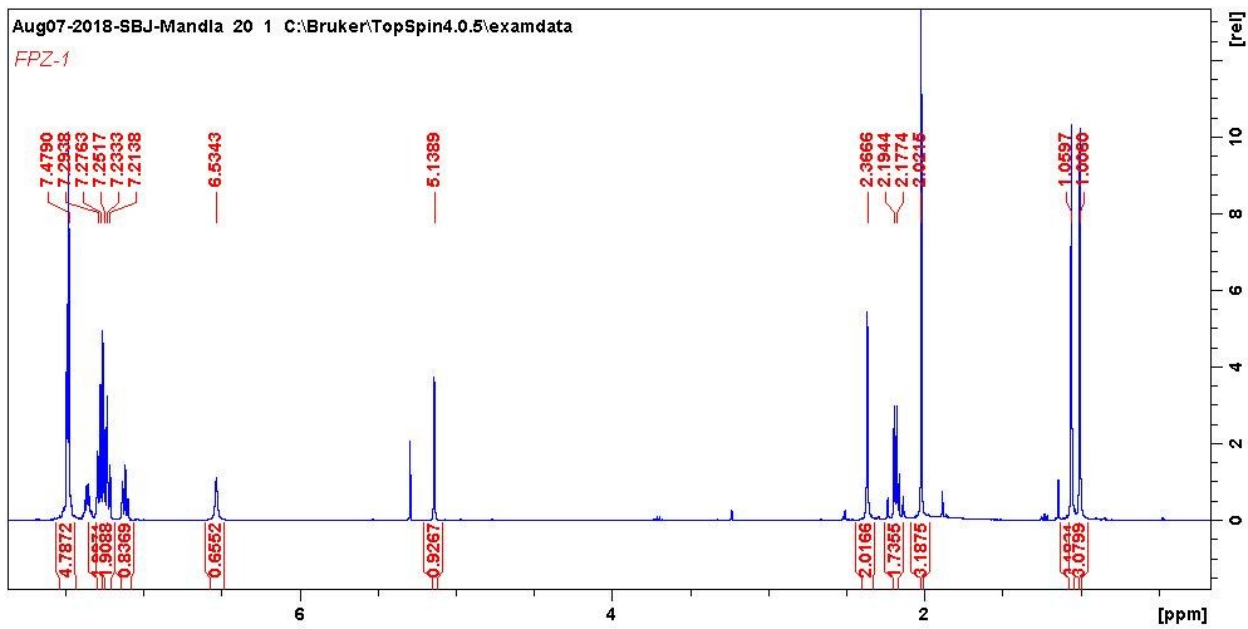

<sup>1</sup>H NMR spectra of compound 4j

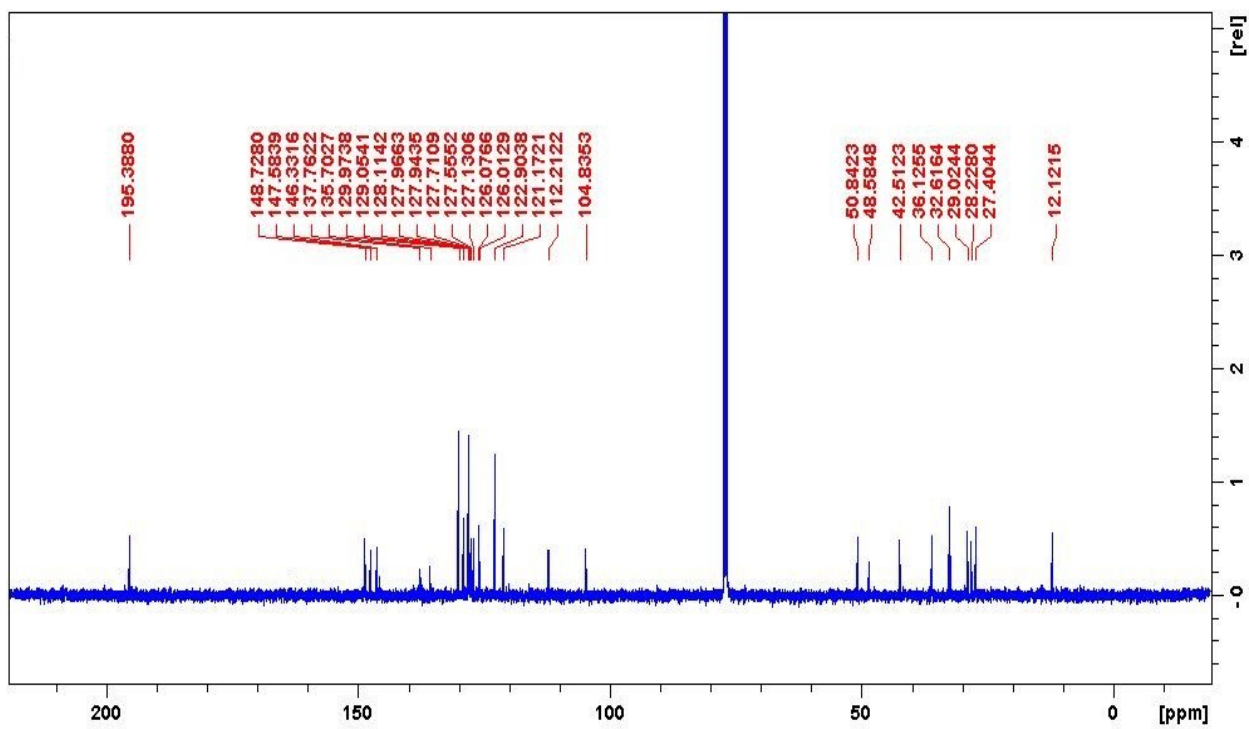

<sup>13</sup>C NMR spectra of compound 4j

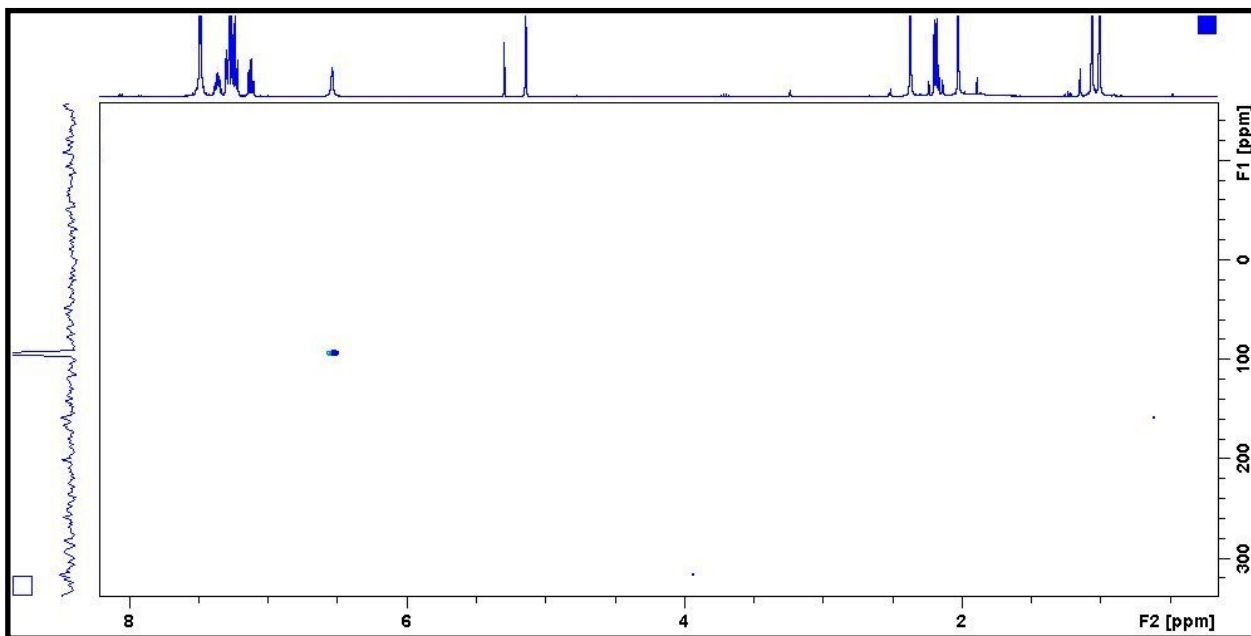

$^{15}\text{N}$  NMR spectra of compound 4j

## Elemental Composition Report

Page 1

### Single Mass Analysis

Tolerance = 5.0 PPM / DBE: min = -1.5, max = 50.0

Element prediction: Off

Number of isotope peaks used for i-FIT = 3

Monoisotopic Mass, Even Electron Ions

71 formula(e) evaluated with 1 results within limits (all results (up to 1000) for each mass)

Elements Used:

C: 20-25 H: 20-25 N: 0-5 O: 0-5 Na: 0-1 Br: 0-1

FP-11 59 (1.956) Cm (1:61)  
TOF MS ES+

3.62e+005

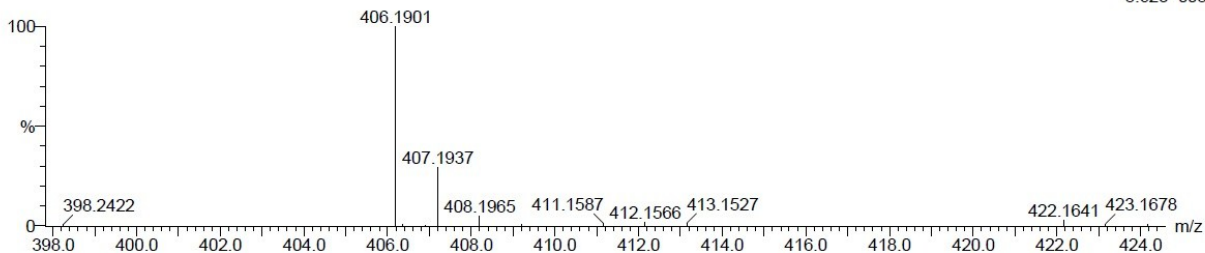

Minimum:

Maximum: 5.0 5.0 -1.5

| Mass | Calc. Mass | mDa | PPM | DBE | i-FIT | i-FIT (Norm) | Formula |
|------|------------|-----|-----|-----|-------|--------------|---------|
|------|------------|-----|-----|-----|-------|--------------|---------|

|          |          |     |     |      |      |     |                 |
|----------|----------|-----|-----|------|------|-----|-----------------|
| 406.1901 | 406.1895 | 0.6 | 1.5 | 14.5 | 41.4 | 0.0 | C25 H25 N3 O Na |
|----------|----------|-----|-----|------|------|-----|-----------------|

## HRMS spectra of compound 4j

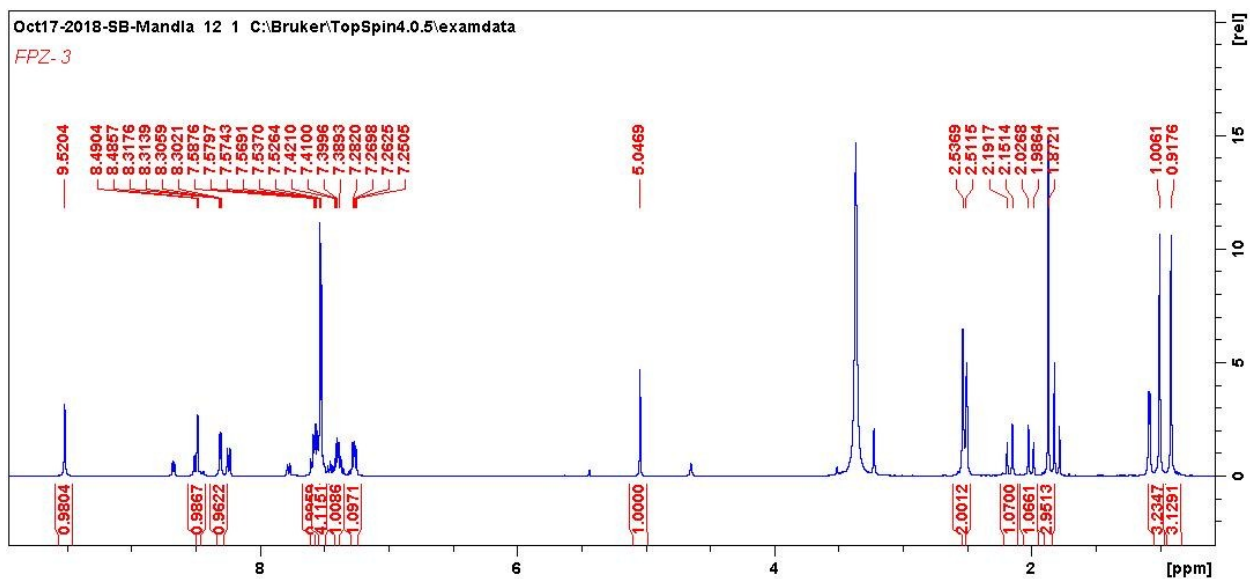

<sup>1</sup>H NMR spectra of compound 4k

Oct17-2018-SB-Mandla 11 1 C:\Bruker\TopSpin4.0.5\examdata

FPZ-3

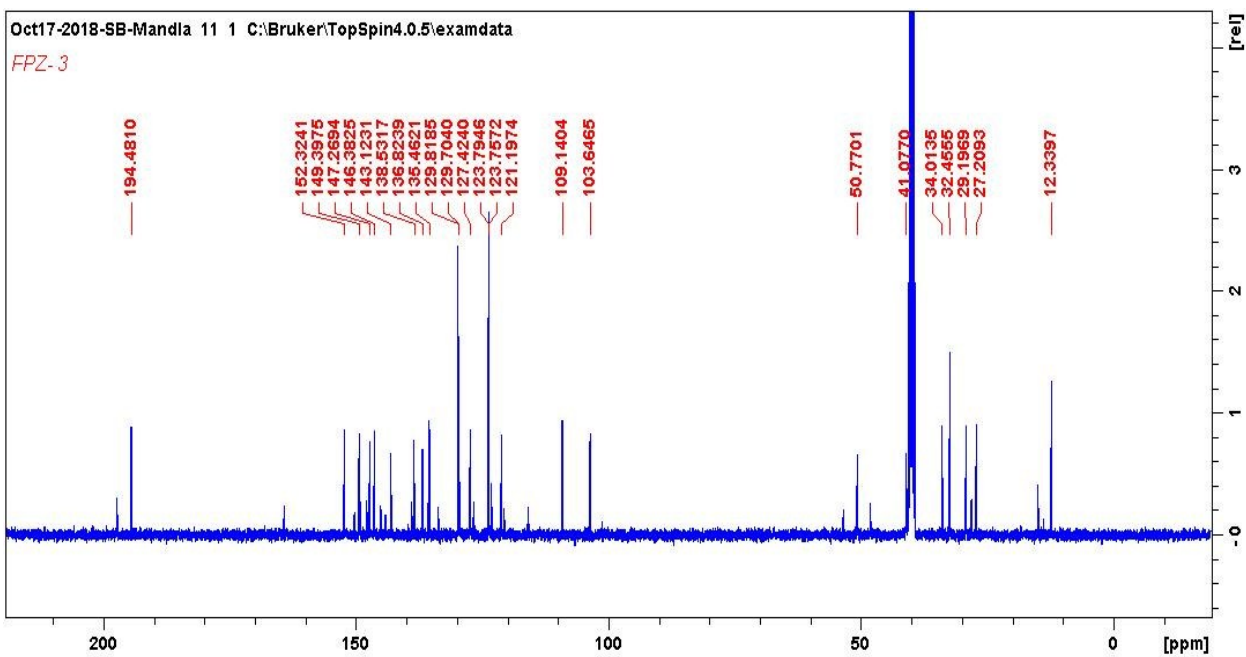

<sup>13</sup>C NMR spectra of compound 4k

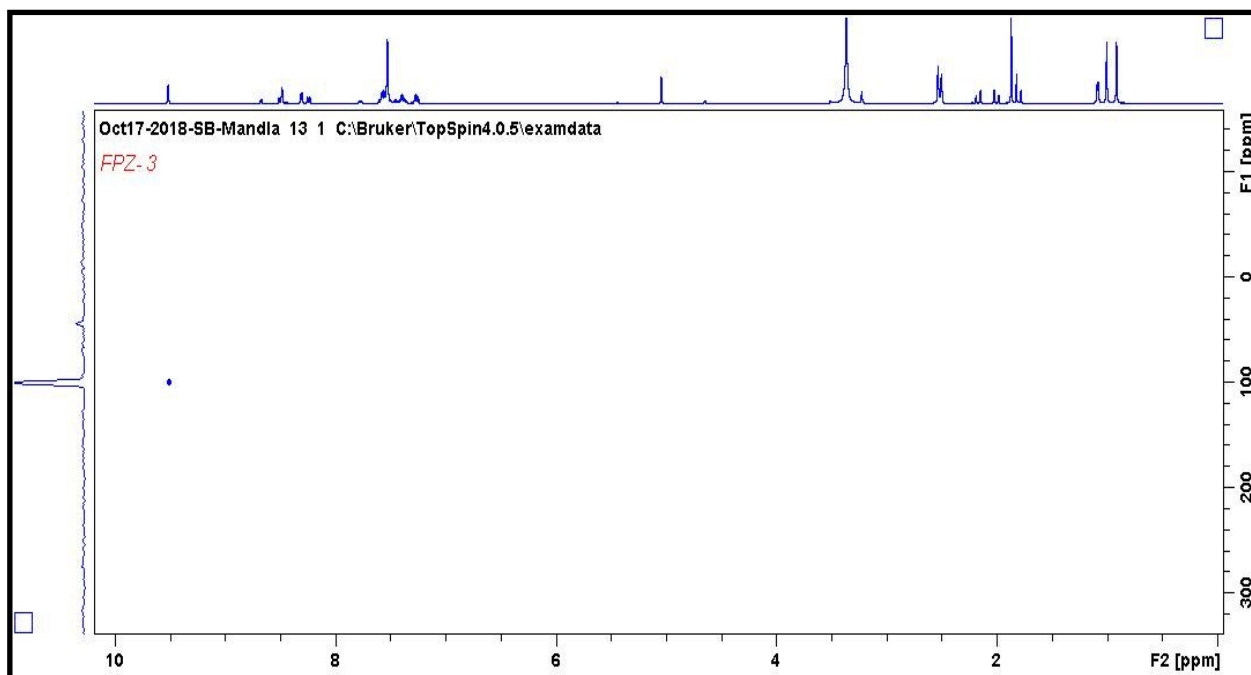

<sup>15</sup>N NMR spectra of compound 4k

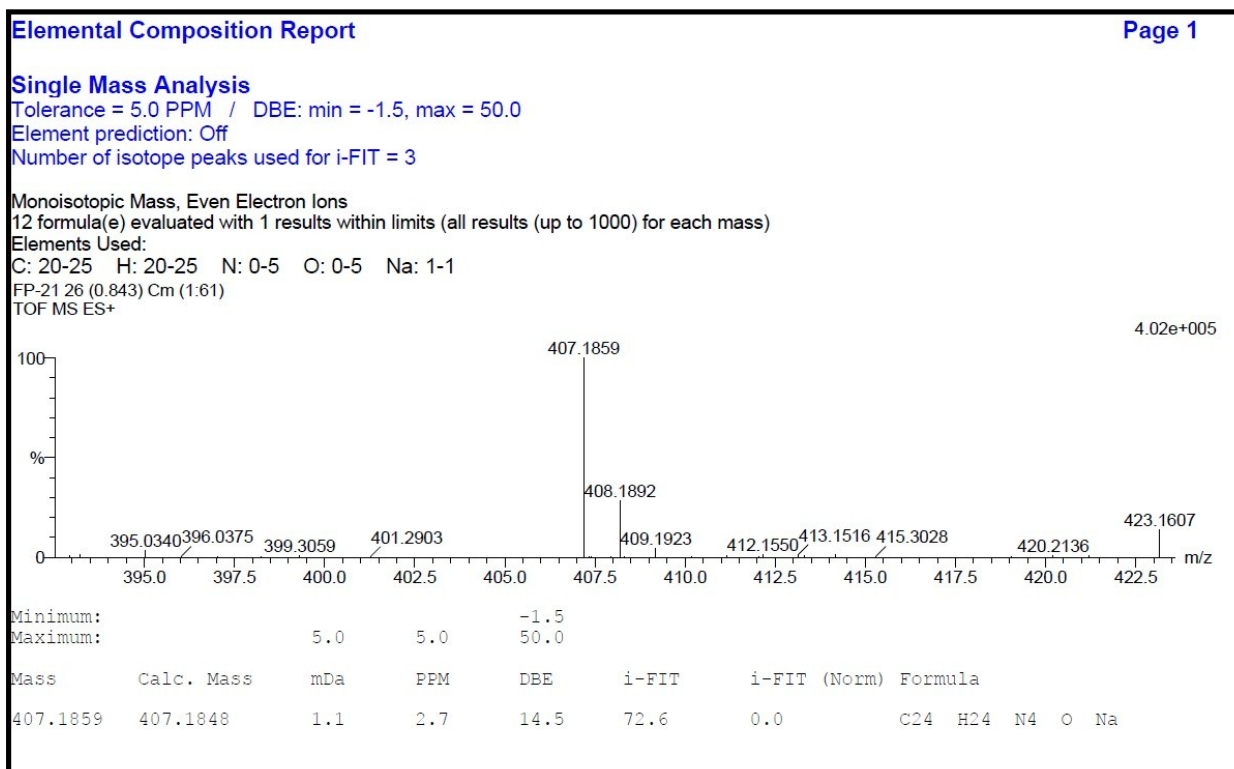

HRMS spectra of compound 4k

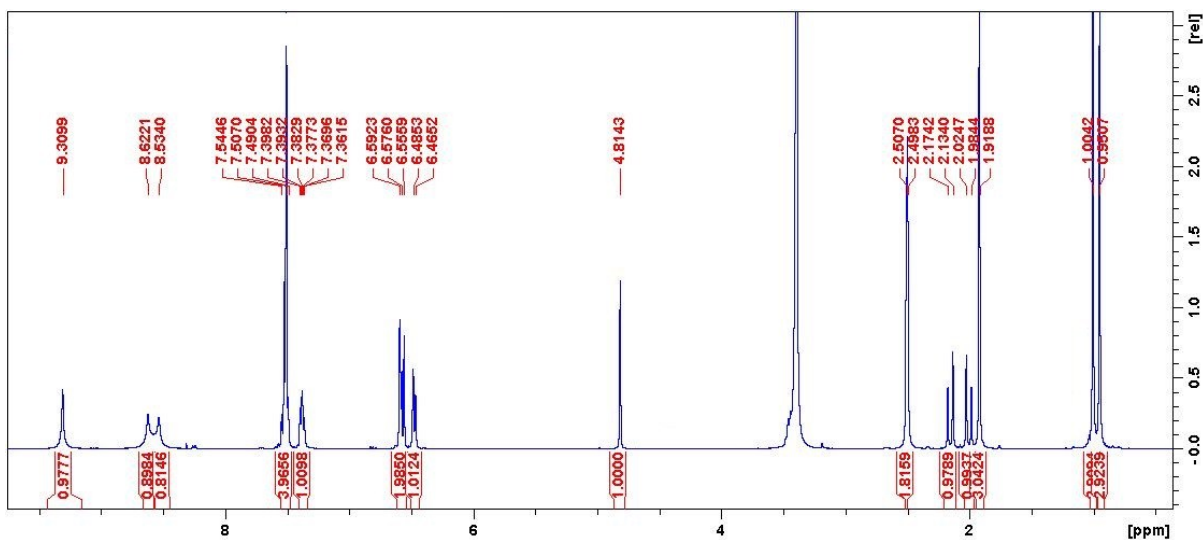

<sup>1</sup>H NMR spectra of compound 41

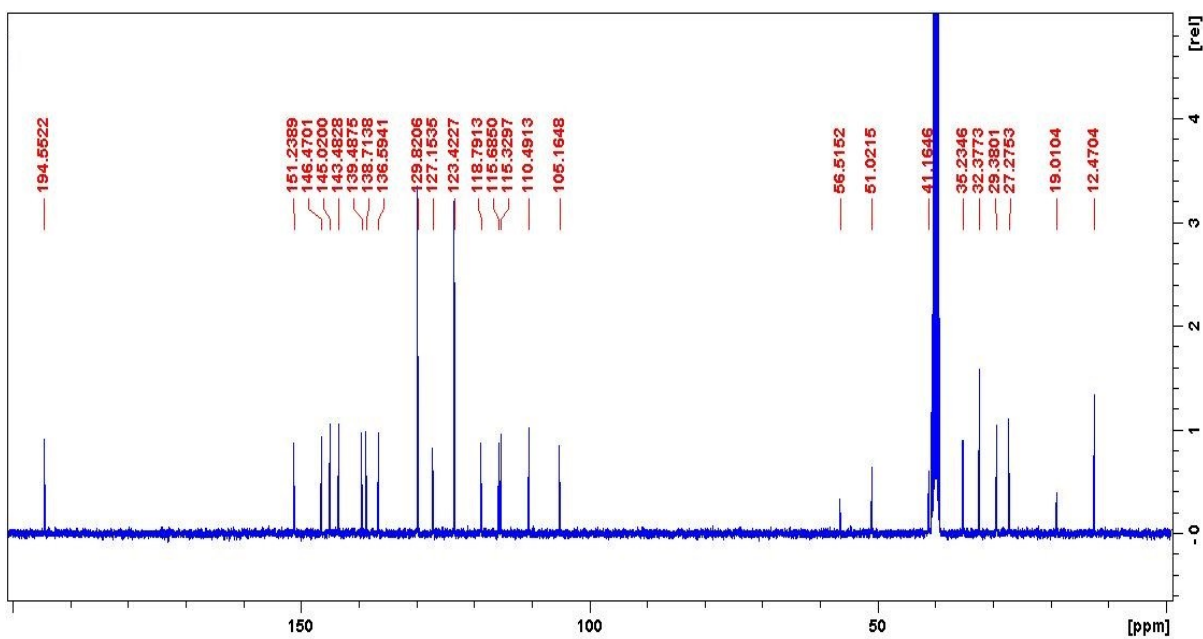

<sup>13</sup>C NMR spectra of compound 41



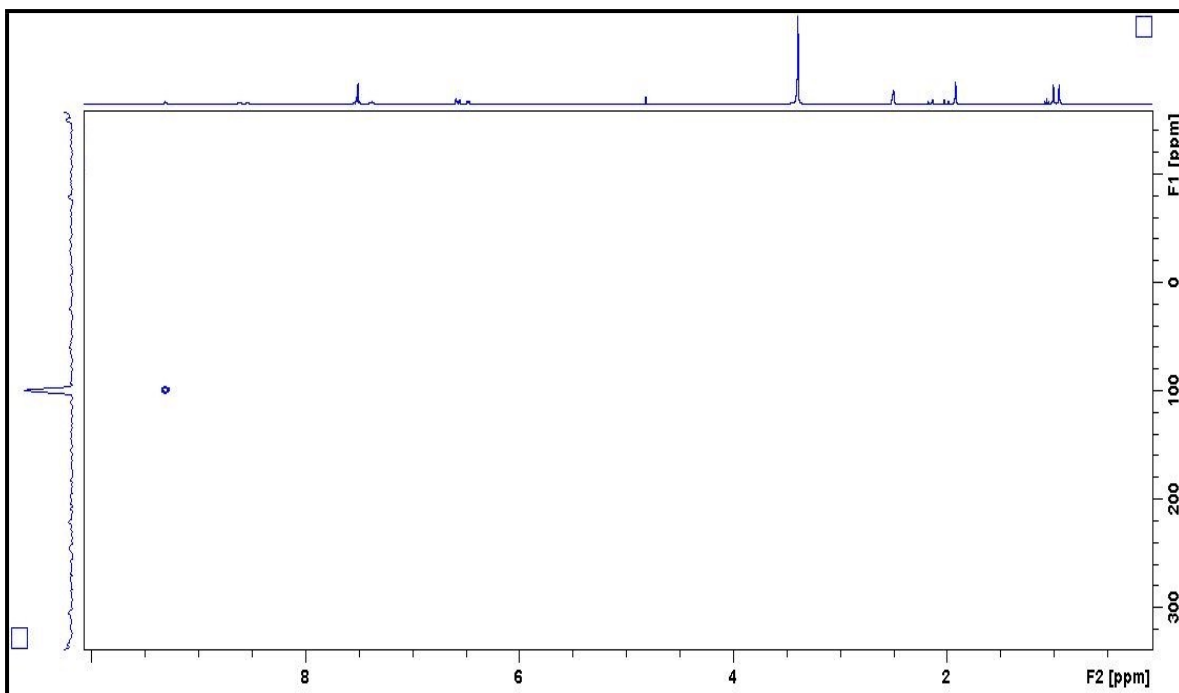

<sup>15</sup>N NMR spectra of compound 41

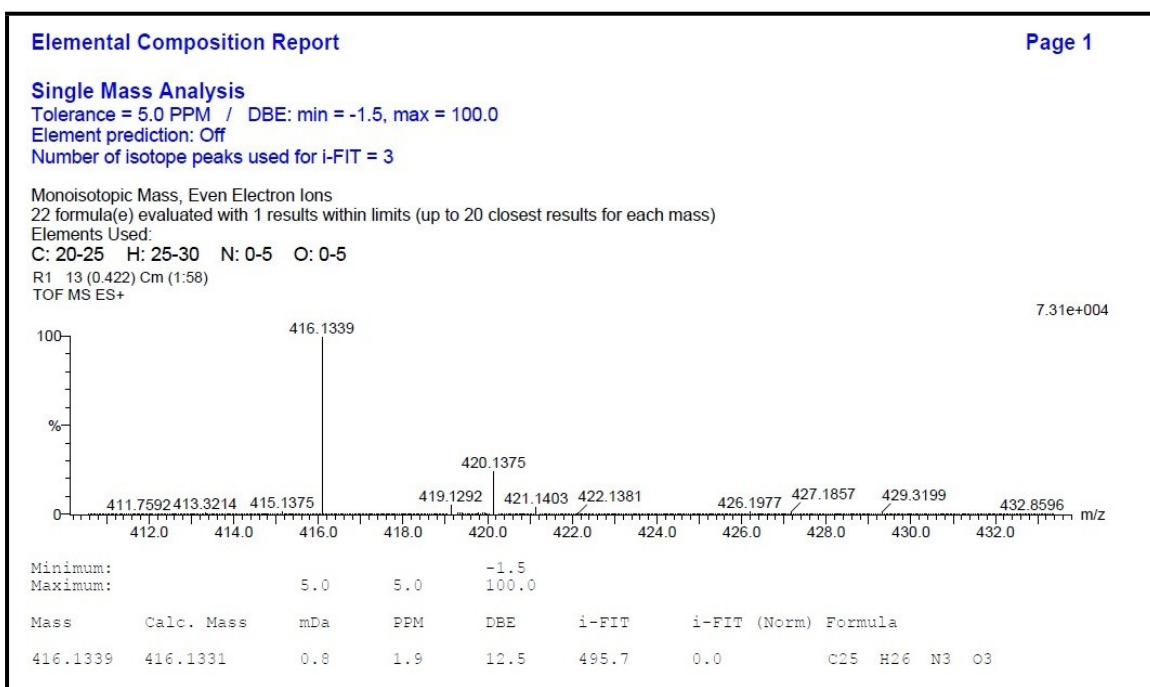

HRMS spectra of compound 41

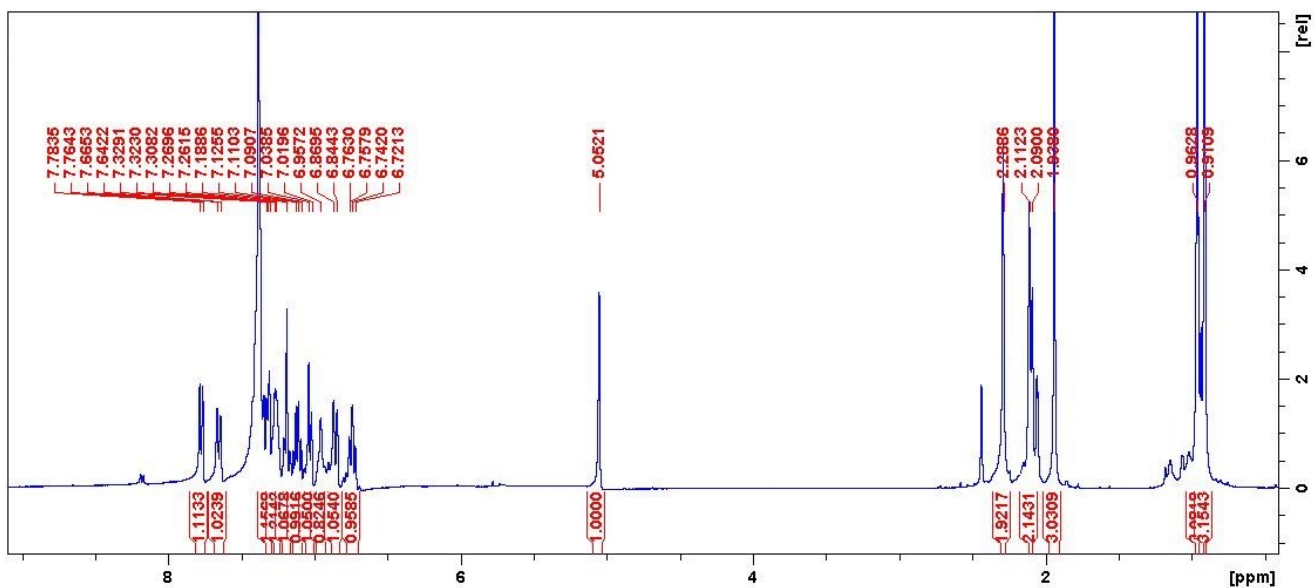

<sup>1</sup>H NMR spectra of compound 4m

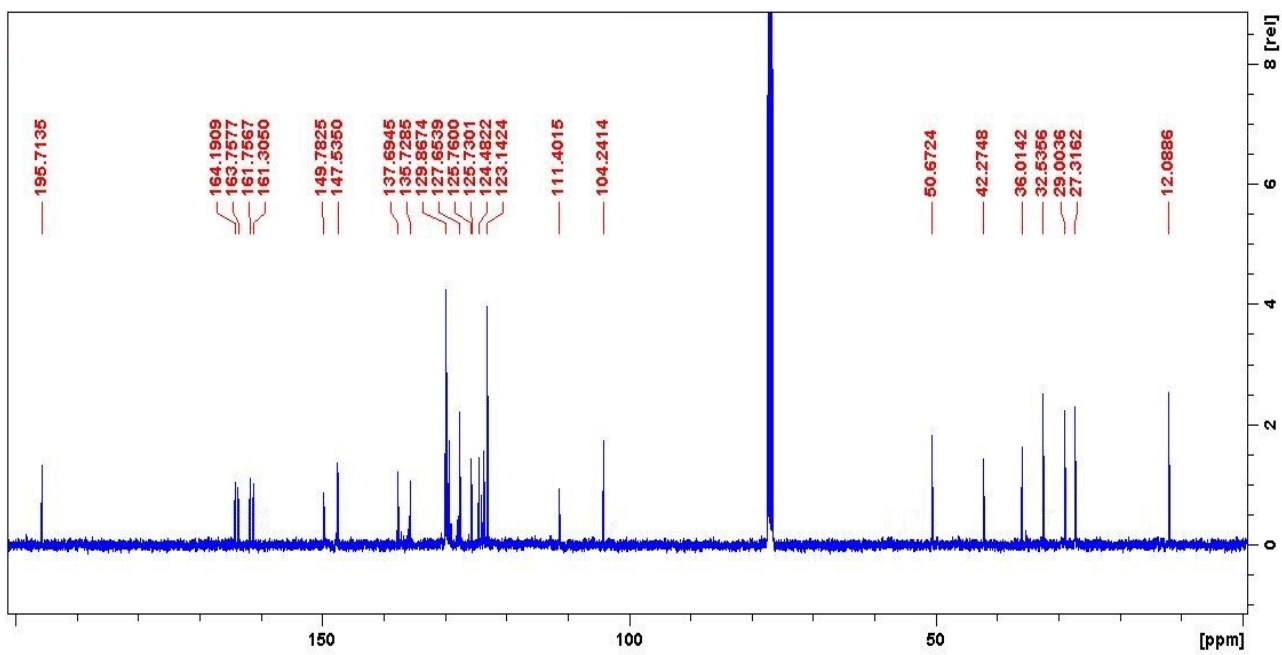

<sup>13</sup>C NMR spectra of compound 4m

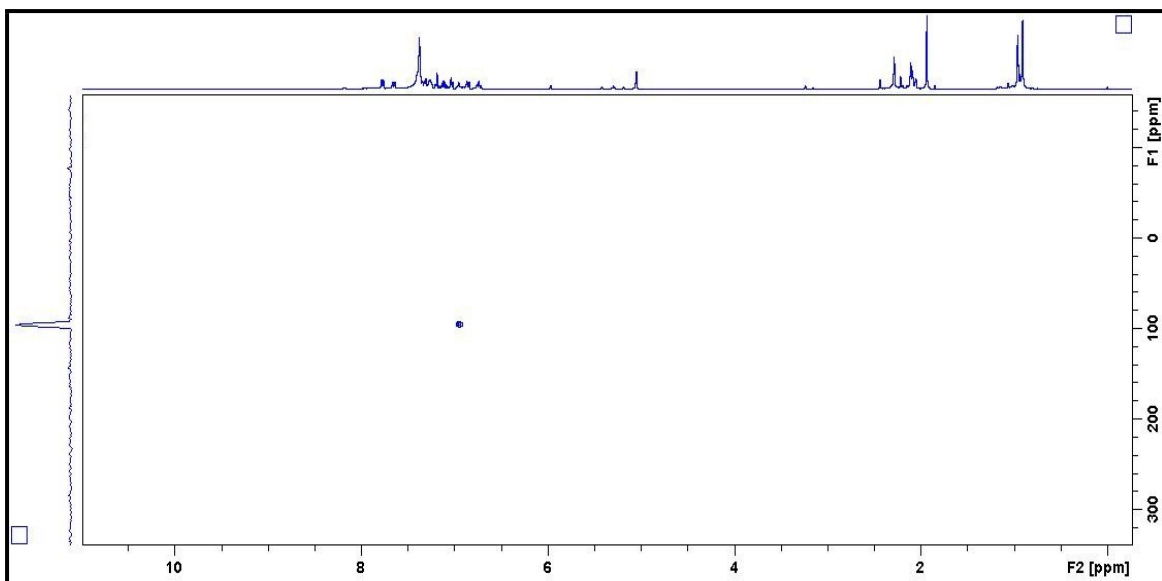

<sup>15</sup>N NMR spectra of compound 4m

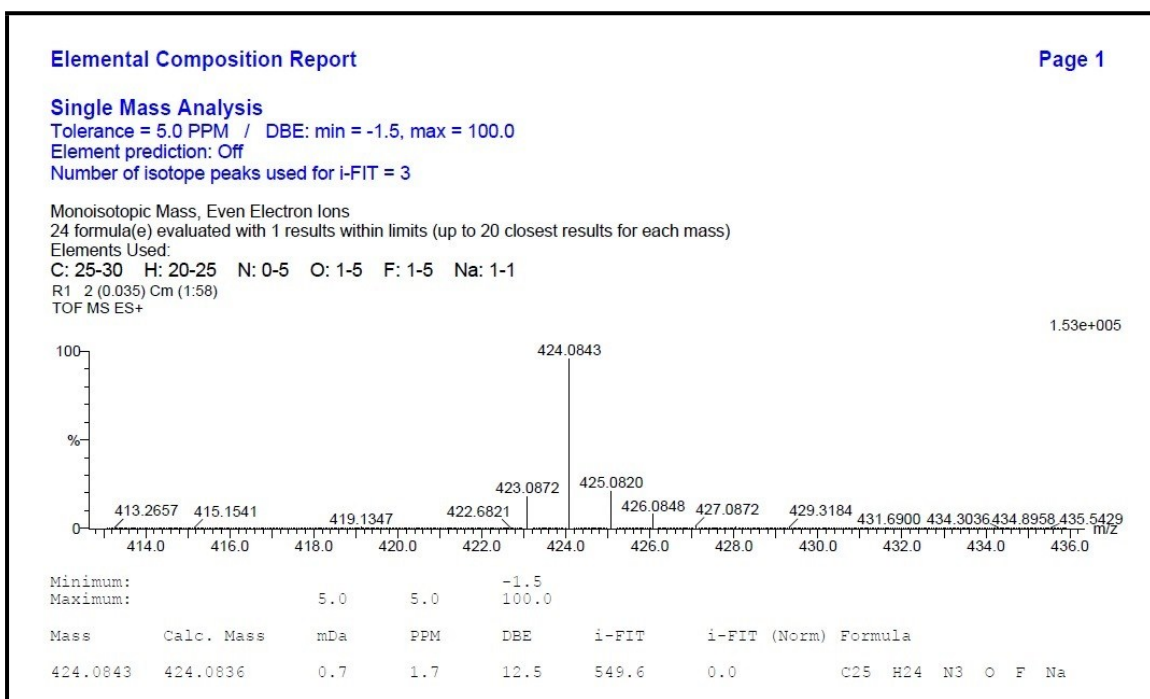

HRMS spectra of compound 4m

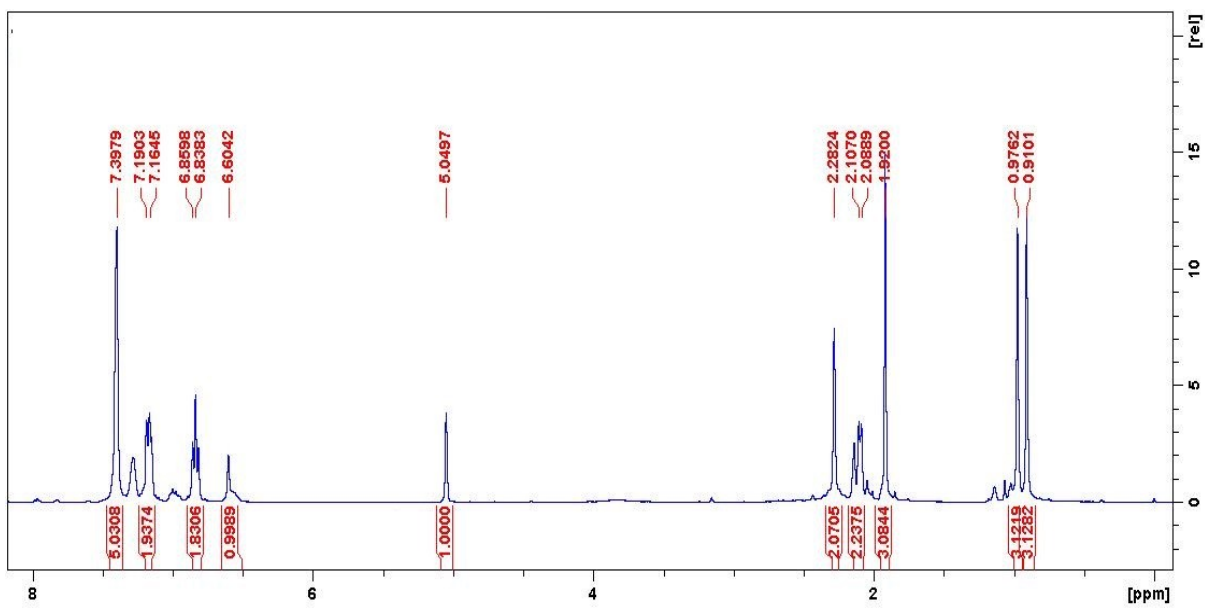

<sup>1</sup>H NMR spectra of compound 4n

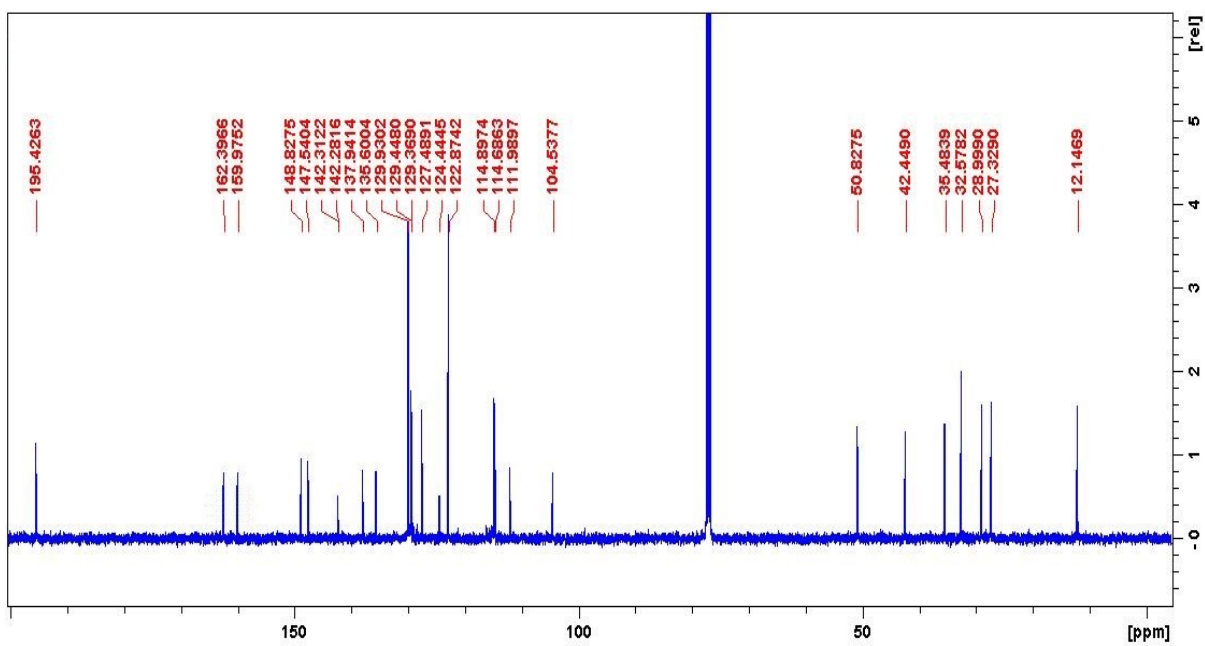

<sup>13</sup>C NMR spectra of compound 4n

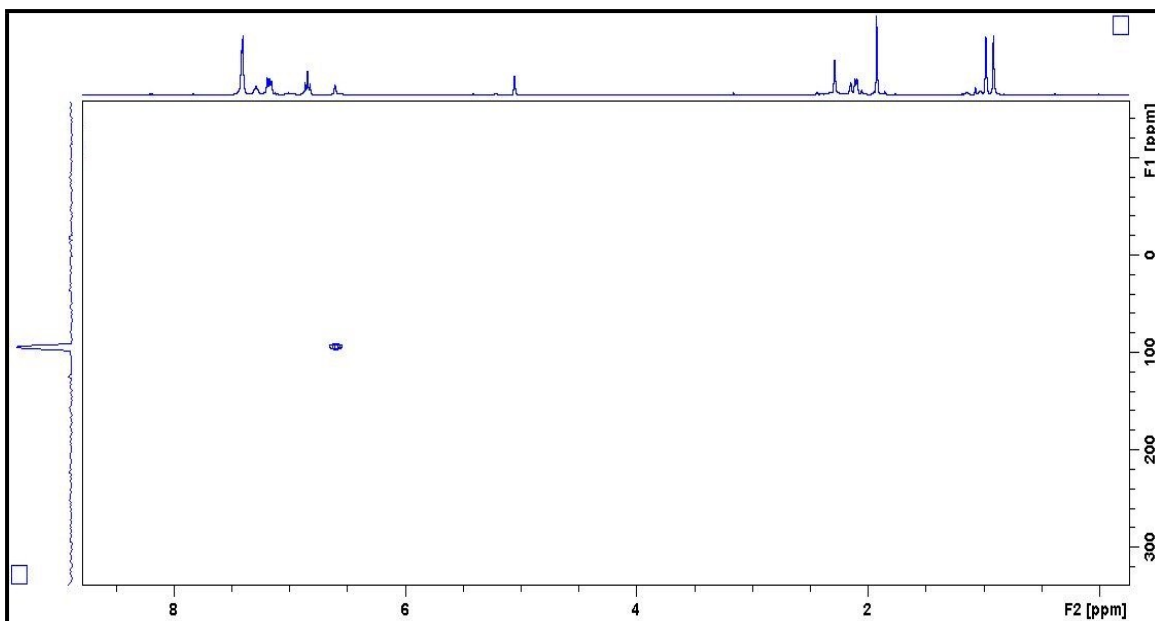

<sup>15</sup>N NMR spectra of compound **4n**

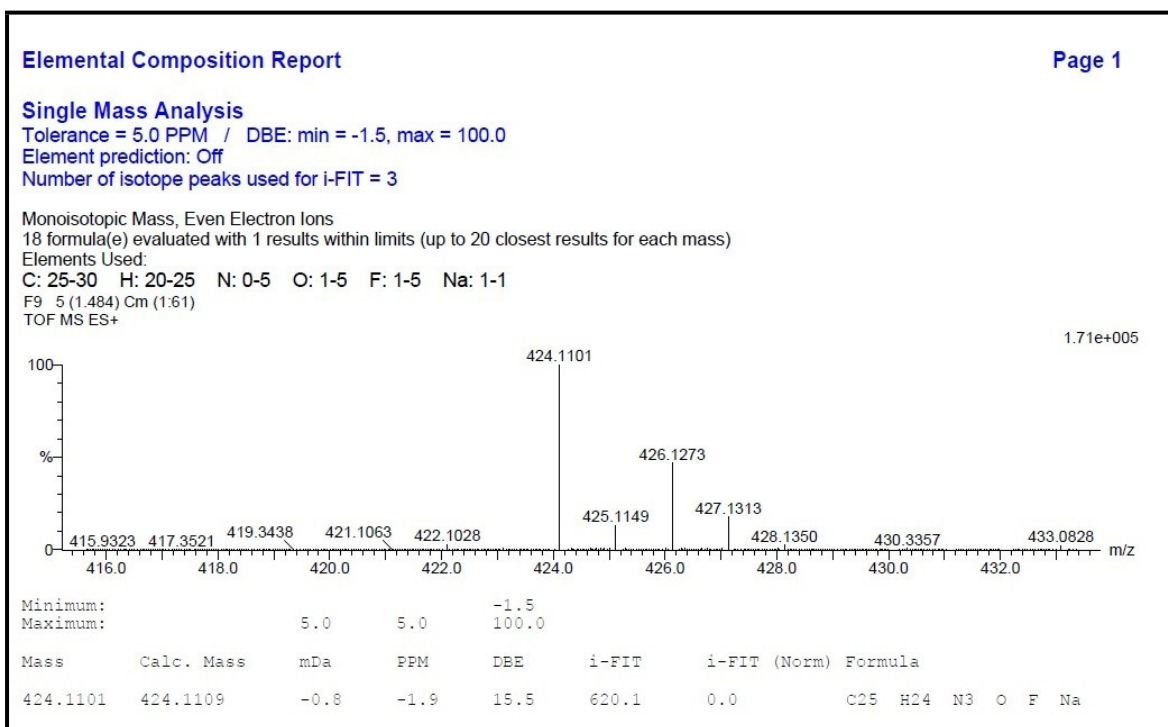

HRMS spectra of compound **4n**

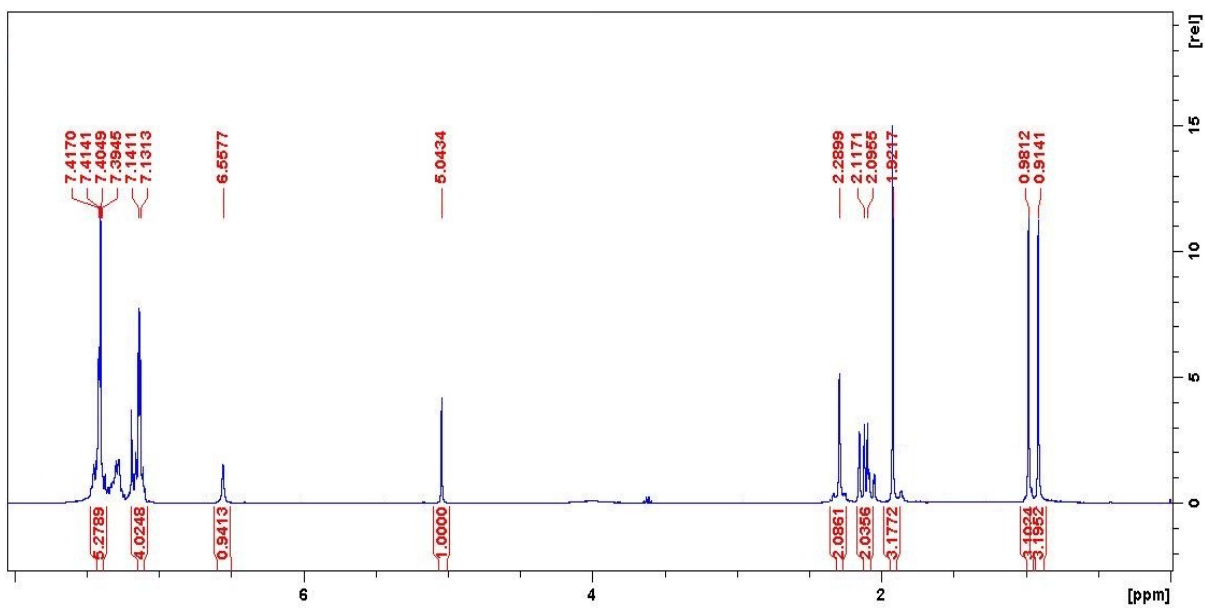

<sup>1</sup>H NMR spectra of compound 4o

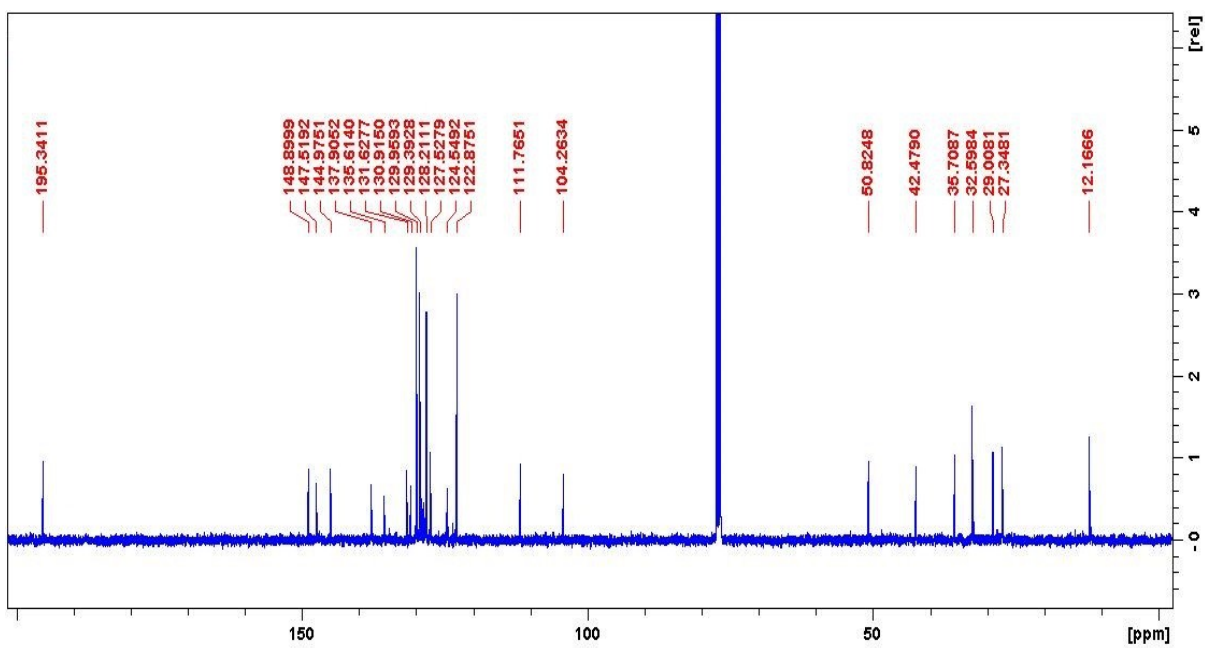

<sup>13</sup>C NMR spectra of compound 4o

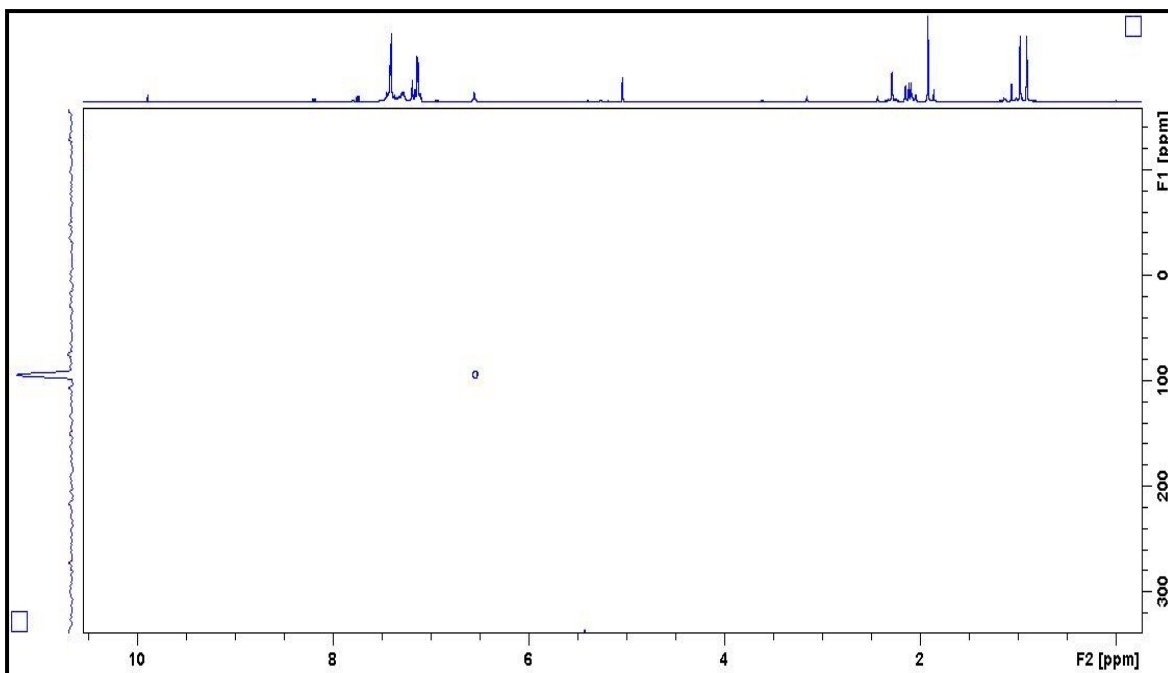

$^{15}\text{N}$  NMR spectra of compound **4o**

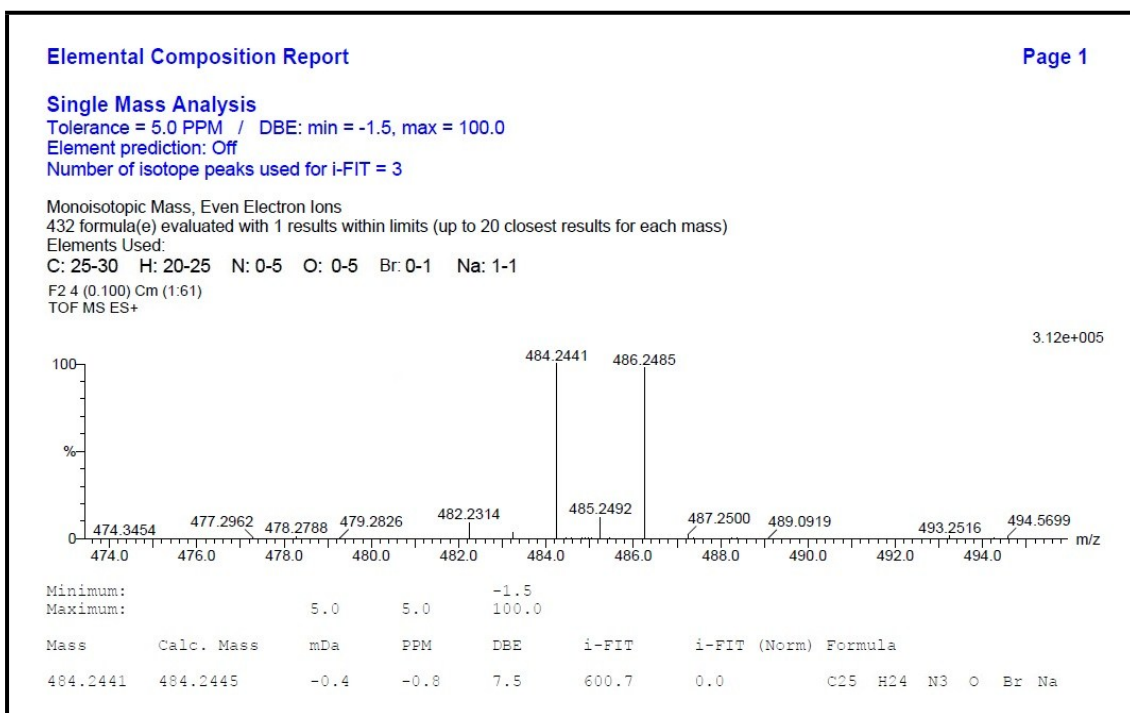

HRMS spectra of compound **4o**

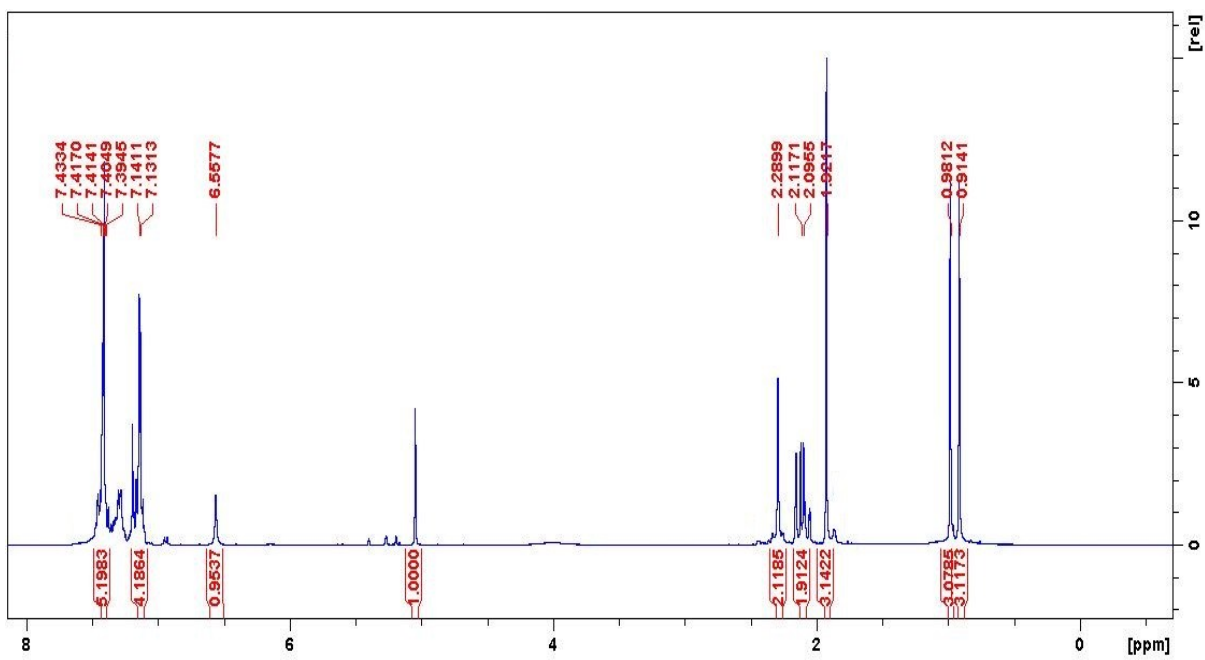

<sup>1</sup>H NMR spectra of compound 4p

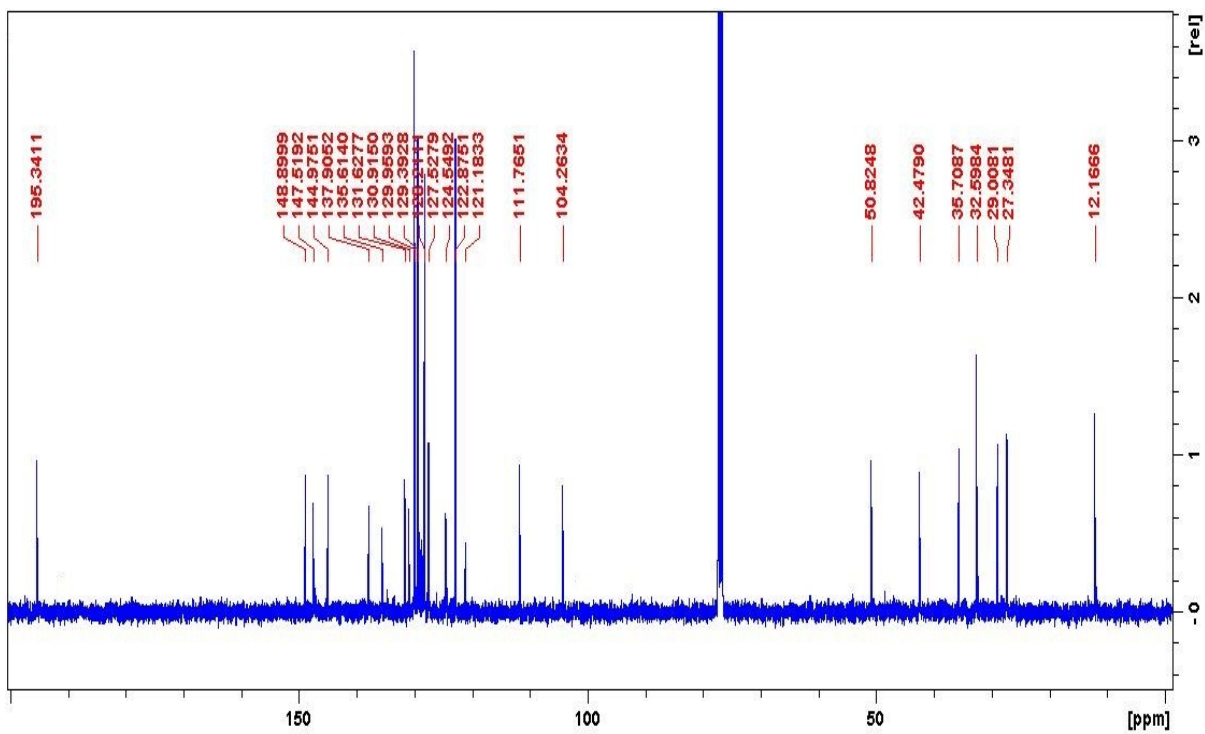

<sup>13</sup>C NMR spectra of compound 4p



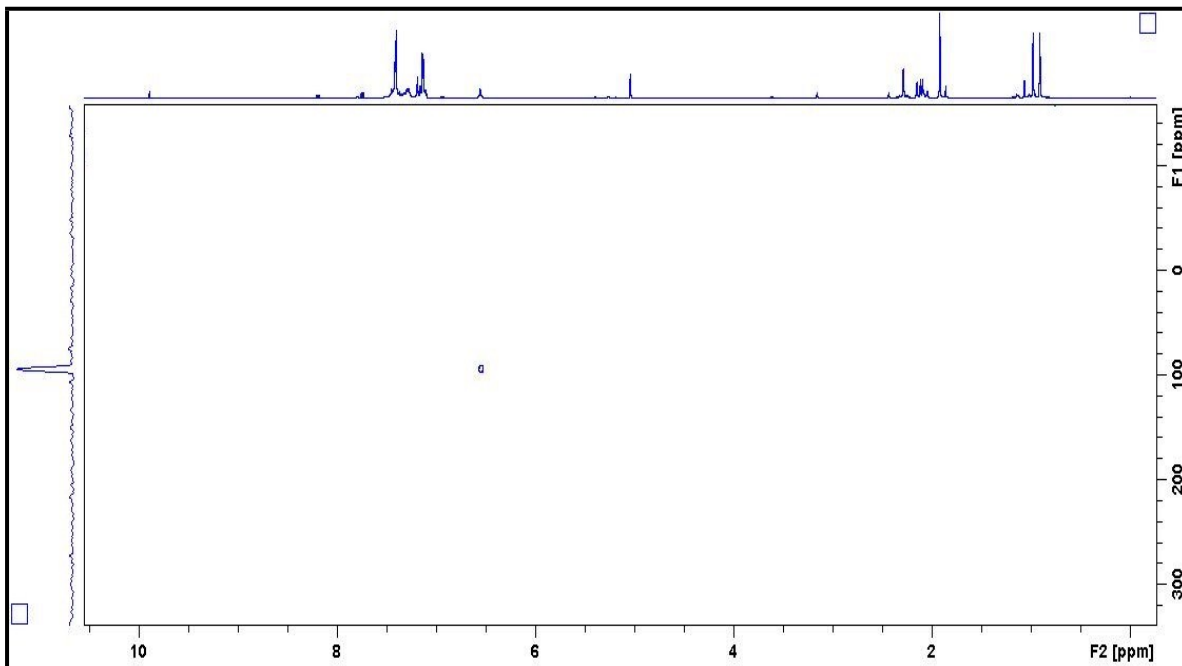

<sup>15</sup>N NMR spectra of compound 4p

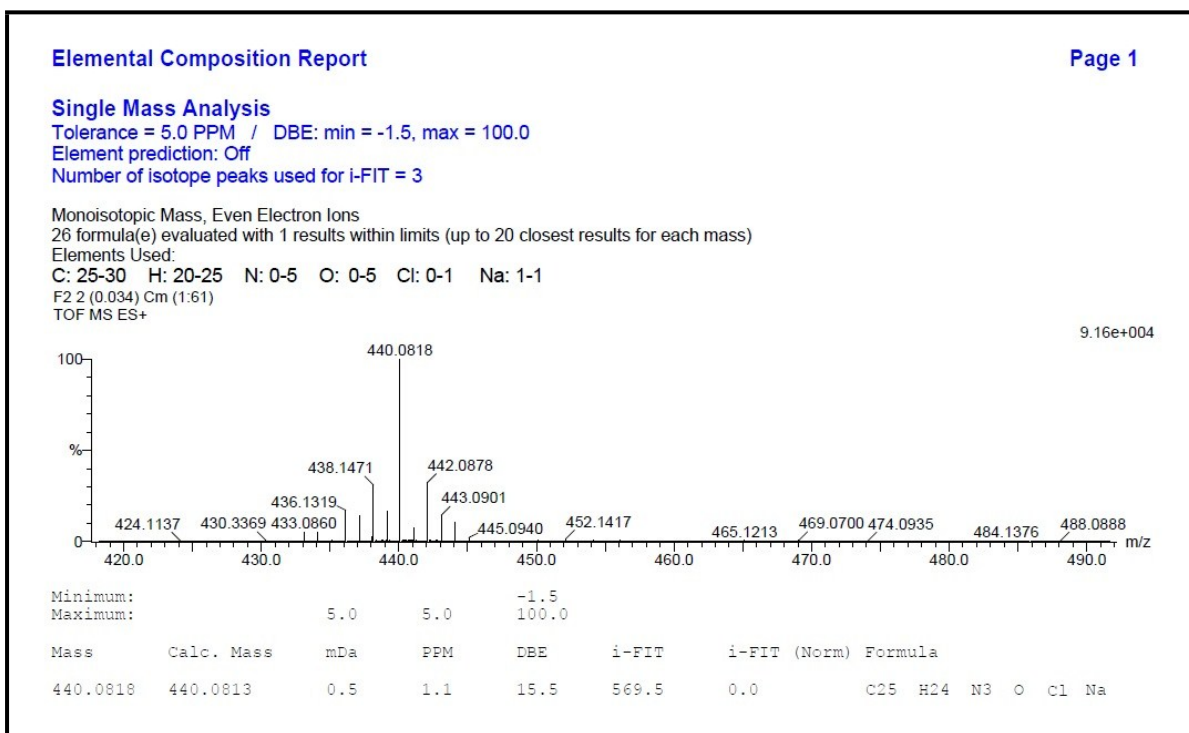

HRMS spectra of compound 4p

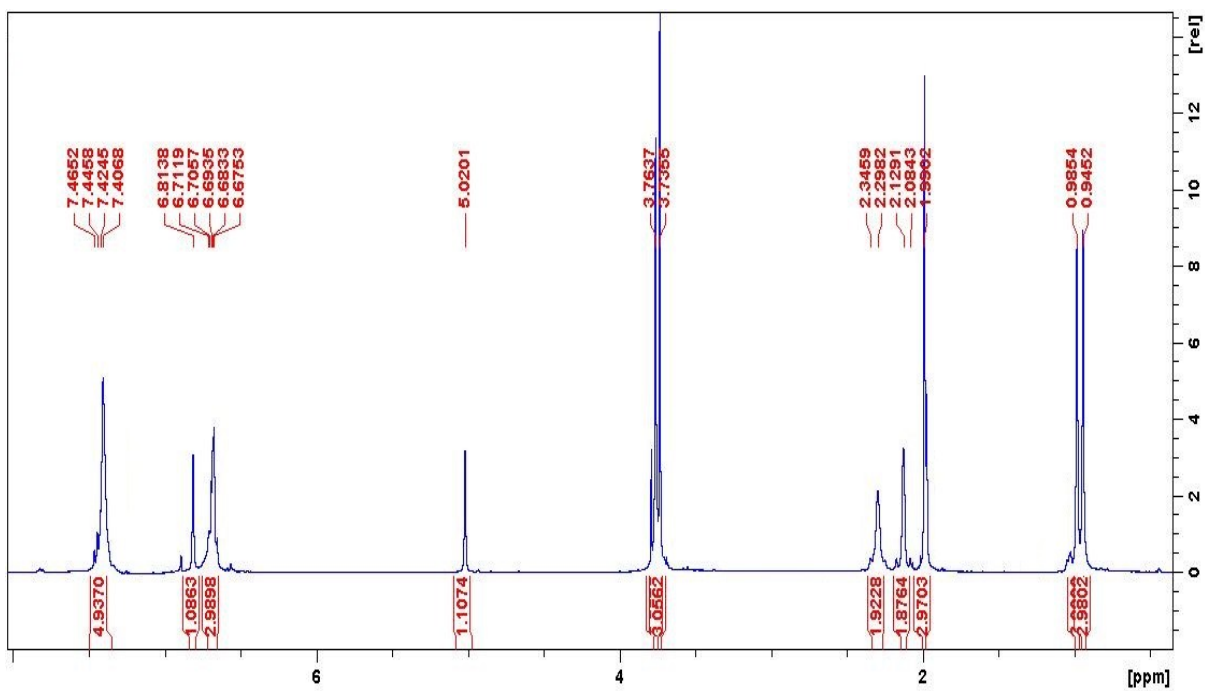

<sup>1</sup>H NMR spectra of compound 4q

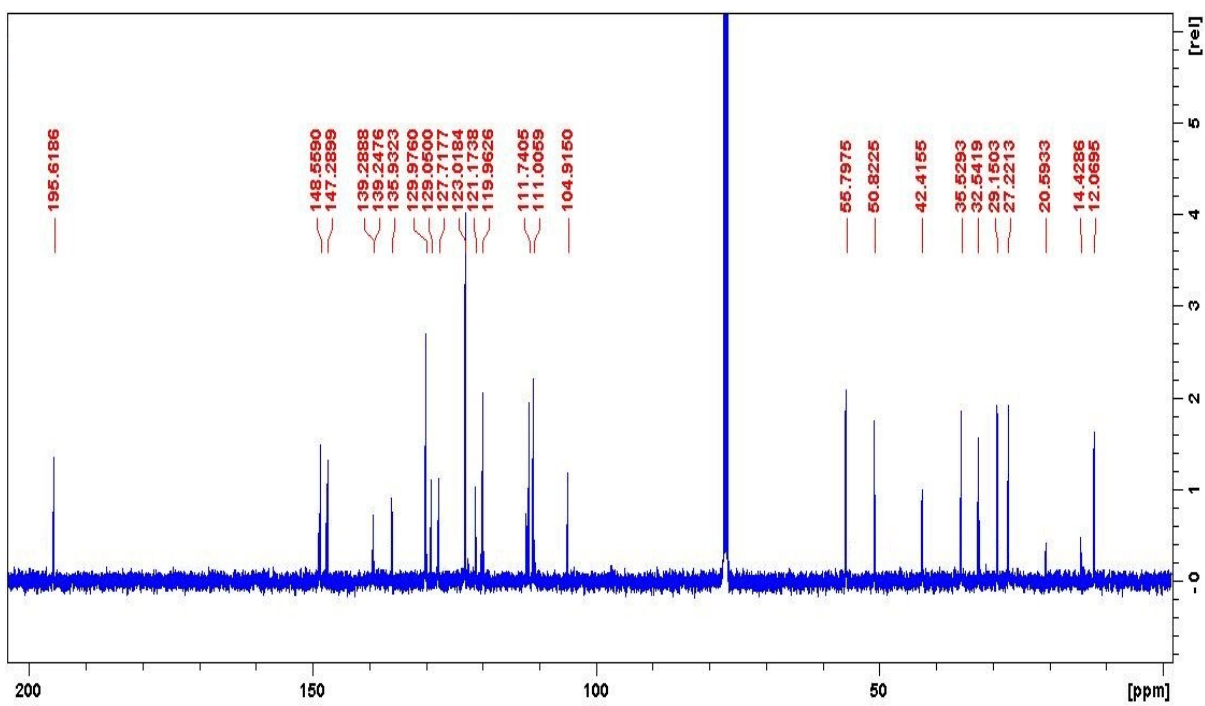

<sup>13</sup>C NMR spectra of compound 4q

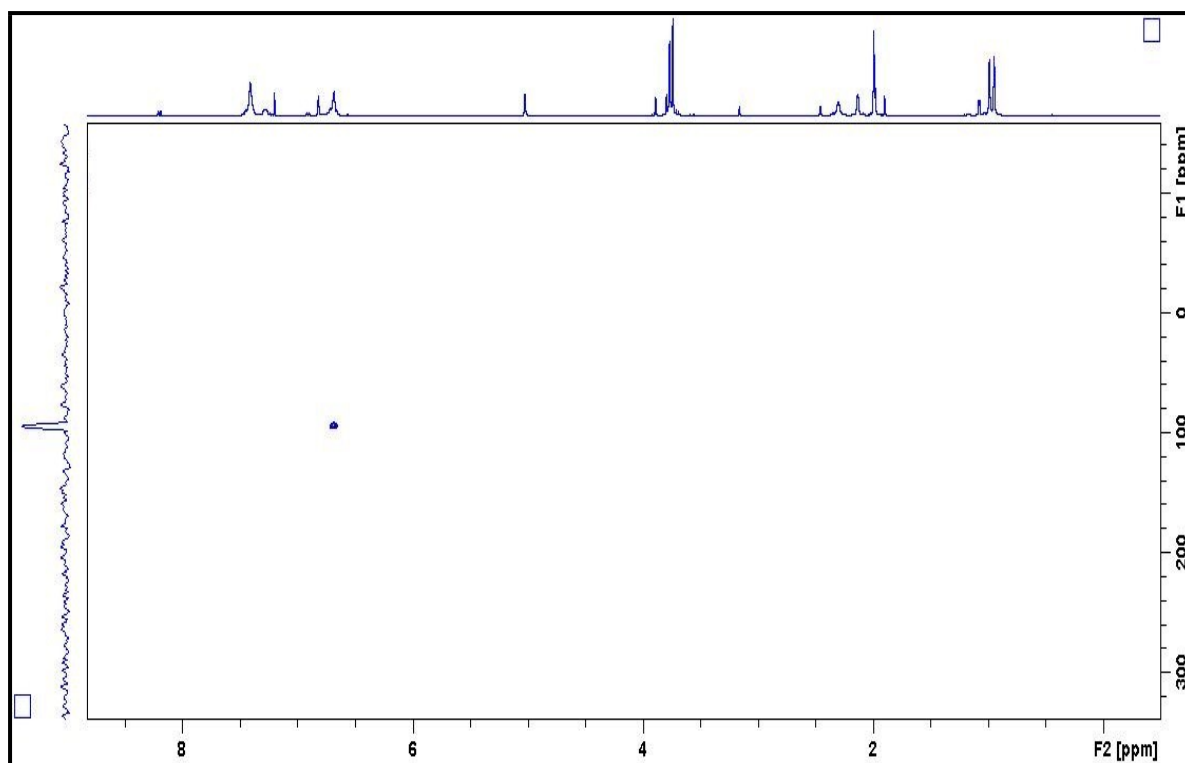

<sup>15</sup>N NMR spectra of compound 4q

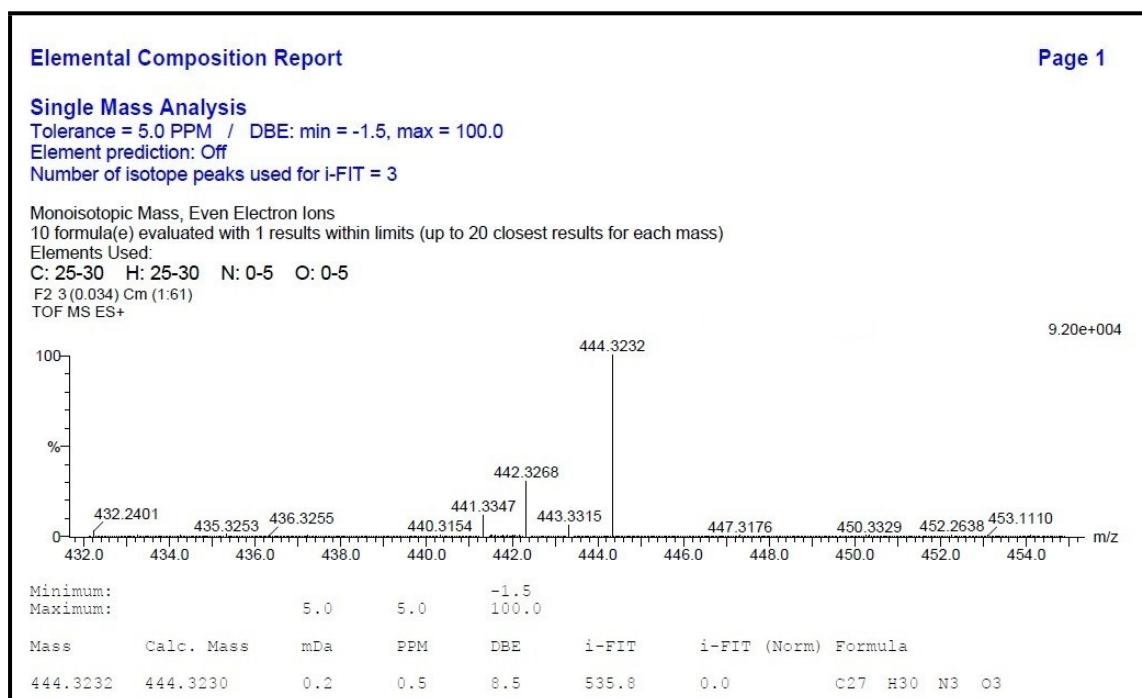

HRMS spectra of compound 4q

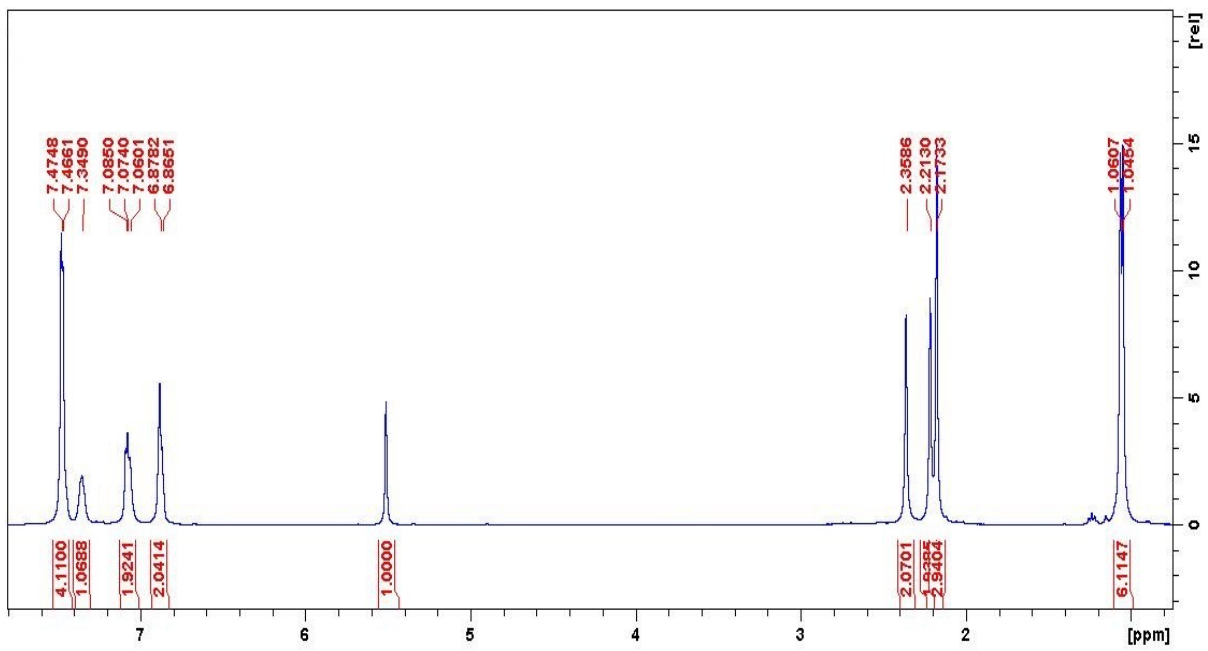

<sup>1</sup>H NMR spectra of compound 4r

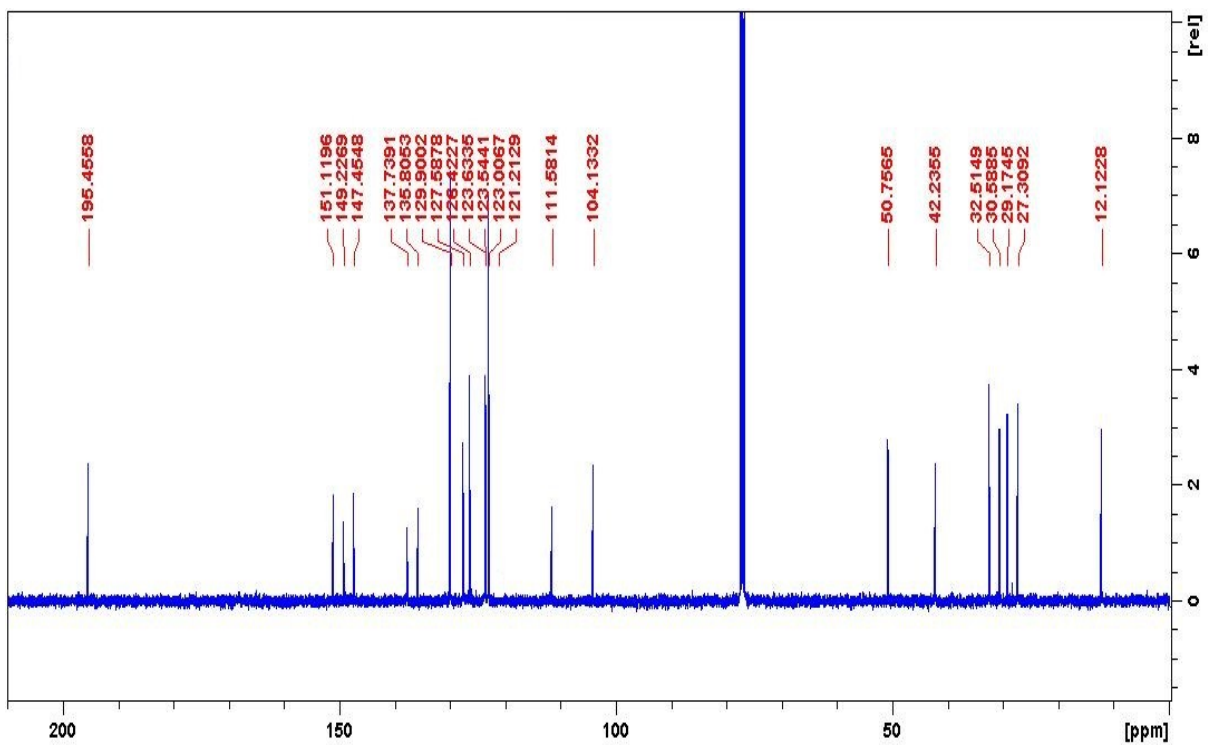

<sup>13</sup>C NMR spectra of compound 4r

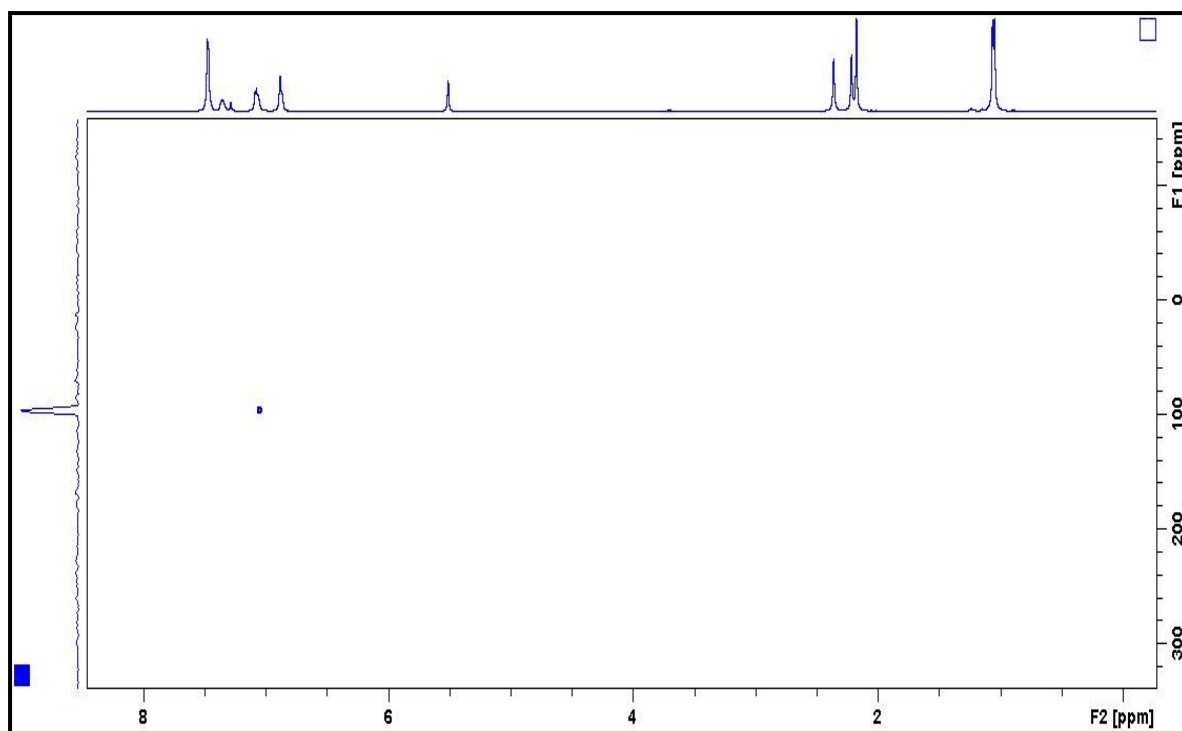

$^{15}\text{N}$  NMR spectra of compound 4r
